# Supplementary material
Source: PubMed Central journal article supplement (PMC9050942)
Supplement: NIHMS1791917-supplement-320005_Major_Resources_Table.pdf [file NIHMS1791917-supplement-320005_Major_Resources_Table.pdf]

## Major Resources Table

In order to allow validation and replication of experiments, all essential research materials listed in the Methods should be included in the Major Resources Table below. Authors are encouraged to use public repositories for protocols, data, code, and other materials and provide persistent identifiers and/or links to repositories when available. Authors may add or delete rows as needed.

### Animals (in vivo studies)

| Species | Vendor or Source | Background Strain            | Sex             | Persistent ID / URL                                                               |
|---------|------------------|------------------------------|-----------------|-----------------------------------------------------------------------------------|
| Mouse   | Jackson Labs     | C57BL/6J (JAX stock #000664) | Male and Female | <a href="https://www.jax.org/strain/000664">https://www.jax.org/strain/000664</a> |

### Genetically Modified Animals

|                 | Species | Vendor or Source              | Background Strain | Other Information                                                                                                                                                                           | Persistent ID / URL                                                                                                                                                                                                     |
|-----------------|---------|-------------------------------|-------------------|---------------------------------------------------------------------------------------------------------------------------------------------------------------------------------------------|-------------------------------------------------------------------------------------------------------------------------------------------------------------------------------------------------------------------------|
| Parent - Male   | Mouse   | Jackson Labs                  | C57BL/6J          |                                                                                                                                                                                             | C57BL/6-Dyrk1a <sup>tm1Jdc/J</sup>                                                                                                                                                                                      |
| Parent - Female | Mouse   | Jackson Labs                  | C57BL/6J          |                                                                                                                                                                                             | C57BL/6-Dyrk1a <sup>tm1Jdc/J</sup>                                                                                                                                                                                      |
| Parent - Male   | Mouse   | Jackson Labs                  | C57BL/6J          |                                                                                                                                                                                             | (B6.Cg-Gt(ROSA)26Sor <sup>tm1.2(CAG-tdTomato,-EGFP)Pjen/J</sup> )<br><a href="https://www.jax.org/strain/026931">https://www.jax.org/strain/026931</a>                                                                  |
| Parent - Female | Mouse   | Jackson Labs                  | C57BL/6J          |                                                                                                                                                                                             | (B6.Cg-Gt(ROSA)26Sor <sup>tm1.2(CAG-tdTomato,-EGFP)Pjen/J</sup> )<br><a href="https://www.jax.org/strain/026931">https://www.jax.org/strain/026931</a>                                                                  |
| Parent - Male   | Mouse   | Jackson Labs                  | C57BL/6J          |                                                                                                                                                                                             | $\alpha$ MHC-Cre (B6.FVB-Tg(Myh6-cre)2182Mds/J)<br><a href="https://www.jax.org/strain/011038">https://www.jax.org/strain/011038</a>                                                                                    |
| Parent - Female | Mouse   | Jackson Labs                  | C57BL/6J          |                                                                                                                                                                                             | $\alpha$ MHC-Cre (B6.FVB-Tg(Myh6-cre)2182Mds/J)<br><a href="https://www.jax.org/strain/011038">https://www.jax.org/strain/011038</a>                                                                                    |
| Parent - Male   | Mouse   | Jackson Labs                  | C57BL/6J          |                                                                                                                                                                                             | B6.129P2-Gt(ROSA)26Sor <sup>tm1(DTA)Lky/J</sup> )<br><a href="https://www.jax.org/strain/009669">https://www.jax.org/strain/009669</a>                                                                                  |
| Parent - Female | Mouse   | Jackson Labs                  | C57BL/6J          |                                                                                                                                                                                             | B6.129P2-Gt(ROSA)26Sor <sup>tm1(DTA)Lky/J</sup> )<br><a href="https://www.jax.org/strain/009669">https://www.jax.org/strain/009669</a>                                                                                  |
| Parent - Male   | Mouse   | European Mouse Mutant Archive | C57BL/6J          |                                                                                                                                                                                             | B6;129P2-Gt(ROSA) <sup>26Sortm1(CAG-Venus/GMNN,-Cherry/CDT1)Jkn/JknH (aka CAG-STOP-Fucci2aR)</sup><br><a href="http://www.informatics.jax.org/allele/MGI:5645798">http://www.informatics.jax.org/allele/MGI:5645798</a> |
| Parent - Female | Mouse   | European Mouse Mutant Archive | C57BL/6J          |                                                                                                                                                                                             | B6;129P2-Gt(ROSA) <sup>26Sortm1(CAG-Venus/GMNN,-Cherry/CDT1)Jkn/JknH (aka CAG-STOP-Fucci2aR)</sup><br><a href="http://www.informatics.jax.org/allele/MGI:5645798">http://www.informatics.jax.org/allele/MGI:5645798</a> |
| Parent - Male   | Mouse   | Wolf Lab                      | C57BL/6J          | Construct made and validated in Wolf Lab, transgenic mice made by Cyagen, Inc., currently backcrossed ten generations into C57BL/6J (See Bradley, L.A. et al. <i>Circulation Research</i> . | $\alpha$ MHC-MerDreMer-Ki67p-RoxedCre::Rox-Lox-tdTomato-eGFP ( $\alpha$ DKRC)                                                                                                                                           |

|  |  |  |  |                                                                |  |
|--|--|--|--|----------------------------------------------------------------|--|
|  |  |  |  | 2021;128:155–168.<br>DOI:<br>10.1161/CIRCRESAHA.<br>120.318277 |  |
|--|--|--|--|----------------------------------------------------------------|--|

## Antibodies

| Target antigen                | Vendor or Source       | Catalog #   | Working concentration | Persistent ID / URL                                                                                                                                                                                                                                                                     |
|-------------------------------|------------------------|-------------|-----------------------|-----------------------------------------------------------------------------------------------------------------------------------------------------------------------------------------------------------------------------------------------------------------------------------------|
| mCherry                       | Origene, Inc           | TA150125    | 1:600 dilution        | <a href="https://www.origene.com/catalog/antibodies/tag-antibodies/ta150125/rabbit-polyclonal-mcherry-antibody">https://www.origene.com/catalog/antibodies/tag-antibodies/ta150125/rabbit-polyclonal-mcherry-antibody</a>                                                               |
| GFP                           | Origene, Inc           | R1091P      | 1:1200 dilution       | <a href="https://www.origene.com/catalog/antibodies/primary-antibodies/r1091p/gfp-ads-to-hu-ms-rt-serum-proteins-goat-polyclonal-antibody">https://www.origene.com/catalog/antibodies/primary-antibodies/r1091p/gfp-ads-to-hu-ms-rt-serum-proteins-goat-polyclonal-antibody</a>         |
| Goat IgG                      | ThermoFisher           | A11055      | 1:100 dilution        | <a href="https://www.thermofisher.com/antibody/product/Donkey-anti-Goat-IgG-H-L-Cross-Adsorbed-Secondary-Antibody-Polyclonal/A-11055">https://www.thermofisher.com/antibody/product/Donkey-anti-Goat-IgG-H-L-Cross-Adsorbed-Secondary-Antibody-Polyclonal/A-11055</a>                   |
| Rabbit IgG                    | ThermoFisher           | A21207      | 1:100 dilution        | <a href="https://www.thermofisher.com/antibody/product/Donkey-anti-Rabbit-IgG-H-L-Highly-Cross-Adsorbed-Secondary-Antibody-Polyclonal/A-21207">https://www.thermofisher.com/antibody/product/Donkey-anti-Rabbit-IgG-H-L-Highly-Cross-Adsorbed-Secondary-Antibody-Polyclonal/A-21207</a> |
| Rat IgG                       | Jackson Immunoresearch | 712-475-153 | 1:100 dilution        | <a href="https://www.jacksonimmuno.com/catalog/products/712-475-153">https://www.jacksonimmuno.com/catalog/products/712-475-153</a>                                                                                                                                                     |
| Wheat Germ Agglutinin WGA-647 | ThermoFisher           | W32466      | 1:100 dilution        | <a href="https://www.thermofisher.com/order/catalog/product/W32466#/W32466">https://www.thermofisher.com/order/catalog/product/W32466#/W32466</a>                                                                                                                                       |
| DAPI                          | Abcam                  | Ab104139    |                       | <a href="https://www.abcam.com/mounting-medium-with-dapi-aqueous-fluoroshield-ab104139.html">https://www.abcam.com/mounting-medium-with-dapi-aqueous-fluoroshield-ab104139.html</a>                                                                                                     |
| HRP/AEC detection kit         | Abcam                  | ab64260     |                       | <a href="https://www.abcam.com/rabbit-specific-hrpaec-abc-detection-ihc-kit-ab64260.html">https://www.abcam.com/rabbit-specific-hrpaec-abc-detection-ihc-kit-ab64260.html</a>                                                                                                           |

## TaqMan Gene Expression Assays

| Applied Biosystems Probe |
|--------------------------|
| E2F1 (Mm00432939_m1)     |
| E2F2 (Mm00624964_m1)     |
| E2F3 (Mm01138833_m1)     |
| E2F4 (Mm00514160_m1)     |
| E2F5 (Mm00468171_m1)     |
| E2F6 (Mm00519030_m1)     |
| tfDP1 (Mm00833674_g1)    |
| tfDP2 (Mm00618407_m1)    |
| Lin9 (Mm00613517_m1)     |
| Lin37 (Mm00650488_gh)    |
| Lin52 (Mm00848895_g1)    |
| Lin54 (Mm00554788_m1)    |
| Myb (Mm00501741_m1)      |

DOI [to be added]

|                        |
|------------------------|
| Mybl1 (Mm00485327_m1)  |
| Mybl2 (Mm00485340_m1)  |
| Rb1 (Mm00519030_m1)    |
| RBL1 (Mm01250721_m1)   |
| RBL2 (Mm01242468_m1)   |
| Rbbp4 (Mm00771401_g1)  |
| Dyrk1a (Mm01209881_m1) |
| Dyrk1a (Mm00432929_m1) |
| Dyrk1b (Mm00599813_m1) |
| Dyrk2 (Mm01166529_m1)  |
| Dyrk3 (Mm00523595_m1)  |
| Dyrk4 (Mm01183103_m1)  |
