# Supplementary material
Source: PubMed Central journal article supplement (PMC9050942)
Supplement: NIHMS1791917-supplement-320005_Online.pdf [file NIHMS1791917-supplement-320005_Online.pdf]

## Extended Methods:

**Mice:** All animal care and surgeries were in accordance with UVA ACUC Policy on Rodent Surgery and Perioperative Care under ACUC-approved animal protocol (UVA ACUC Wolf Laboratory protocol No. 4080).  *$\alpha$ MHC -MerDreMer-Ki67p-RoxedCre::Rox-Lox-tdTomato-eGFP ( $\alpha$ DKRC::RLTG)* mice were previously described.<sup>1</sup> *C57BL/6J* (JAX stock #000664),  *$\alpha$ MHC-Cre (B6.FVB-Tg(Myh6-cre)2182Mds/J)*<sup>2</sup>, *C57BL/6-Dyrk1a<sup>tm1Jdc/J</sup>* (*DYRK1a<sup>flox/flox</sup>*) mice<sup>3</sup>, and *ROSA-DTA (B6.129P2-Gt(ROSA)<sup>26Sortm1(DTA)Lky/J</sup>)* were purchased from Jackson labs. *CAG-STOP-Fucci2aR<sup>4</sup>* was obtained from the European Mouse Mutant Archive. *CAG-STOP-Fucci2aR* and  *$\alpha$ MHC-Cre* were backcrossed nine generations into *C57BL/6J* before establishing  *$\alpha$ MHC-Cre/+::CAG-STOP-Fucci2aR/CAG-STOP-Fucci2aR* and  *$\alpha$ MHC-Cre/+::CAG-STOP-Fucci2aR/CAG-STOP-Fucci2aR::DYRK1a<sup>fl/fl</sup>* mice. For experiments using  *$\alpha$ DKRC::RLTG* mice, twelve to fifteen week-old male and female mice were treated with Tamoxifen (1 mg/kg) IP daily for two five-day periods with a two-day rest between rounds (i.e., five days “on”, two days “off”, and five days “on”) followed by a two-week recovery period prior to indicated experiments.

**I/R MI protocol:** We used an I/R MI protocol previously described in our recent publication.<sup>1</sup> Briefly, all animal care and surgeries were in accordance with UVA ACUC Policy on Rodent Surgery and Perioperative Care under ACUC approved animal protocol (UVA ACUC Wolf Lab protocol #4080). The individual performing surgeries was blinded to the mouse genotypes and treatments. In sham control mice, the entire procedure was identical except for the ligation of the LAD. The mortality rate associated with surgeries was ~10%.

**Harmine minipump protocol:** Harmine Sigma (SMB00461) solution was prepared aseptically in a sterile vial the day of the procedure, by dissolving 35 mg of Harmine in 1mL of sterile USP grade DMSO (Sigma #D1435) and water to give a Harmine dose of 10 mg/kg/day. The pH of

the solution was in the physiological range. The Harmine solution was filtered using a 0.22 micron filter prior to loading into sterile, pre-packaged Azlet mini-pumps (#1002) that was subcutaneously implanted into mice.

**Echocardiography:** Mice were anesthetized with Isoflurane and gently restrained on a Vevo integrated rail system. The system included a physiological monitoring unit consisting of a heating board with integrated ECG electrodes. The table temperature was maintained at ~38°C using a rectal probe for temperature feedback. Hair was gently removed, and ultrasound contact gel (warmed to 37°C) was applied to the chest. Echocardiography was performed using a high frequency 30 MHz linear transducer and a Vevo 1100 (Visual Sonics) system similar to previously described methods. Initial B-mode images were obtained in the parasternal long axis with the apex and aortic valves visualized. Next, B-mode short axis images were obtained by turning the ultrasound probe ~90 degrees and identifying the mitral valve papillary muscles. The parasternal long axis images were analyzed using VevoView software to calculate left ventricular dimensions. The individuals performing and analyzing the echocardiography were blinded to the genotypes and treatment groups.

**Isolation of Cardiomyocytes:** Cardiomyocytes from twelve-week old  *$\alpha$ MHC-Cre::Fucci2aR* and  *$\alpha$ MHC-Cre::Fucci2aR::DYRK1a<sup>fl/fl</sup>* mice controls were isolated by retro-aortic cannulation and collagenase treatment by Langendorff isolated heart perfusion as described by Simpson<sup>5</sup>, seven days after Sham or I/R MI surgeries. Briefly, mice were injected with Heparin (100 IU, intraperitoneally) ten minutes before undergoing anesthesia with 3% Isoflurane. After the mouse was fully anesthetized, the hearts were dissected from surrounding tissues and attached via the proximal aorta to a 22-gauge cannula fixed to 1mL syringe loaded with perfusion buffer (10 mM HEPES (pH 7.0) containing 120 mM NaCl, 15 mM KCl, 0.1 mM KH<sub>2</sub>PO<sub>4</sub>, 0.6 mM Na<sub>2</sub>HPO<sub>4</sub>,

1.2 mM MgSO<sub>4</sub>·7H<sub>2</sub>O, 4.6 mM NaHCO<sub>3</sub>, 30 mM Taurine, 10 mM 2,3-butanedione monoxime, and 5.6 mM Glucose). Notably, the perfusion buffer was maintained at 37°C during all perfusion steps. The heart was then carefully removed from the chest and surrounding tissues, and the canular was attached to the perfusion system with attention to avoid the introduction of air into the circulation lines. Then, the cannulated heart was perfused with digestion buffer (perfusion buffer containing collagenase (Worthington Collagenase2, 300 units/ml) and 50 µM Calcium chloride) at a rate of 4ml/min for 20 minutes. A pressure monitor was used to measure resistance pressure during the perfusion. After perfusion, the heart was removed from the apparatus and placed in a petri dish containing 5 ml of digestion buffer. The atria were removed leaving only the ventricles that were placed in a new petri dish containing 3 ml of digestion buffer. The ventricles were mechanically dissociated using micro-forceps and then 5 ml of perfusion buffer containing 10% fetal calf serum and 25 µM Calcium chloride. The tissues were transferred to a 15 ml conical tube along with an additional 2 ml of perfusion buffer containing 10% fetal calf serum and 25 µM Calcium chloride. The tissue was further mechanically dissociated by repeated gentle pipetting and then the myocytes were separated from non-myocytes by centrifugation at 300 RPM for 3 minutes. The supernatant containing non-myocytes was discarded and the myocyte pellet was resuspended in 10 ml of fresh perfusion buffer containing 10% fetal calf serum and 25 µM Calcium chloride, followed by centrifugation at 300 RPM for 3 minutes. After centrifugation, the supernatant was discarded, and the myocyte pellet was frozen at -80°C for subsequent RNAseq and qPCR experiments.

**Quantitative PCR (qPCR):** Cardiomyocytes from eight-week old *αMHC-Cre::Fucci2aR* (5 hearts) and *αMHC-Cre::Fucci2aR::DYRK1a<sup>fl/fl</sup>* mice (3 hearts) were isolated by retrograde perfusion of collagenase using a Langendorff apparatus. RNA was extracted from the heart tissue using the RNeasy kit from Qiagen. For reverse transcription, random primers (1µg) and

10 ng of total RNA were used in a final reaction volume of 20µl containing 100 units of Superscript II (Invitrogen). PCR was performed in duplicate for 40 cycles using 10% of the volume of the reverse transcription in a total volume of 25µl that included 12.5µl of TaqMan Gene Expression Master Mix (4369016 Applied Biosystems) and a 1x final concentration of the following TaqMan Gene Expression Assays (Applied Biosystems) from ThermoFisher Scientific. Dyrk1a (Mm01209881\_m1), Dyrk1b (Mm00599813\_m1), Dyrk2 (Mm01166529\_m1), Dyrk3 (Mm00523595\_m1), and Dyrk4 (Mm01183103\_m1) probes were obtained from ThermoFisher Scientific. mRNA was quantified by real-time PCR analysis using the CFX96 Real Time System coupled with the C1000 Touch Thermal Cycler (BioRad, Inc.). Thermocycler conditions were 40 cycles of denaturation at 95°C for 15 seconds, and annealing and extension step of 60°C for 60 seconds. The  $\Delta$ CT method was used to quantify all relative mRNA levels using 18S RNA as the reference and internal standard. The TaqMan primer-probe set for 18S RNA (4310893e) with the Vic/Tamra detection system was used to measure 18S RNA in replicate samples to those taken for the above listed mRNA quantifications.

For experiments of *C57BL/6J*, hearts were collected at P1, P3, P5, P7, P10, P14, and P28 (seven to nine hearts per time point) and used to isolate total RNA as described above. The following probes were used in TaqMan Gene Expression Assays (Applied Biosystems): E2F1 (Mm00432939\_m1), E2F2 (Mm00624964\_m1), E2F3 (Mm01138833\_m1), E2F4 (Mm00514160\_m1), E2F5 (Mm00468171\_m1), E2F6 (Mm00519030\_m1), tfDP1 (Mm00833674\_g1), tfDP2 (Mm00618407\_m1), Lin9 (Mm00613517\_m1), Lin37 (Mm00650488\_gh), Lin52 (Mm00848895\_g1), Lin54 (Mm00554788\_m1), Myb (Mm00501741\_m1), Mybl1 (Mm00485327\_m1), Mybl2 (Mm00485340\_m1), Rb1 (Mm00519030\_m1), RBL1 (Mm01250721\_m1), RBL2 (Mm01242468\_m1), Rbbp4 (Mm00771401\_g1).

**Histology and Immunohistochemistry:** Hearts were excised and fixed in 10% Neutral Buffered Formalin (Fisher, Inc.) for a minimum of four hours prior to embedding in paraffin. Ten micron sections were prepared in short axis orientation by microtome with 8 sections per glass slide. Paraffin was removed and the tissue sections were rehydrated using Xylene and serial ethanol wash steps, respectively. Antigen retrieval was performed by incubating tissue sections in boiling 1x Unmasking solution (Vector Labs H-3300) for 22 minutes. After cooling to room temperature, the tissue sections were treated with Sudan Black to quench auto-fluorescence if slides were used to immunofluorescence. Briefly, tissue sections were incubated in 0.1% Sudan Black (Sigma, Cat# 199664) in 1x PBS and 70% ethanol at room temperature for 20 minutes to quench auto fluorescence, followed by 3 x five minute washes in 1x PBS containing 0.02% Tween 20, and a final five minute wash in 1x PBS. For immunofluorescence staining, tissue sections were blocked in 1X PBS containing fish skin gelatin oil (FSG) + Donkey Serum (serum : buffer, 1:10) for 1 hour at room temperature. For primary antibodies derived from mice, an additional step to block endogenous mouse IgG was performed using 1X PBS containing Goat F(ab) Anti-Mouse IgG H&L (Abcam-ab6668) for 1 hour at room temperature. After washing 3 x 2min in 1x PBS containing FSG and 0.1 %Tween-20, tissue sections were incubated in primary antibodies (see table for dilutions) in 1x PBS containing FSG overnight at 4°C. Tissue sections were washed with 1x PBS containing FSG and 0.1 %Tween-20 for 5 minutes followed by 1X PBS for 5 min prior to incubation with secondary antibodies (see table for dilutions) in 1x PBS containing FSG and 0.1 %Tween-20. Secondary antibodies were removed and sections were washed with 1x PBS containing FSG and 0.1 %Tween-20 for 5 minutes followed by 1X PBS for 5 min prior to imaging. For immunostaining experiments, controls included heart 6 sections

stained with primary antibodies only and secondary antibodies only. The controls were used to determine background signals and exposure times for subsequent experiments.

To quantify cardiomyocyte cross-sectional areas, ten micron short-axis paraffin embedded sections of hearts of  *$\alpha$ MHC-Cre::Fucci2aR* and  *$\alpha$ MHC-Cre::Fucci2aR::DYRK1a<sup>fl/fl</sup>* mice were stained with anti-mCherry antibody (Origene, Inc. Cat. # TA150125), wheat germ agglutinin (Thermofisher, Inc. Cat # W32466), and DAPI nuclear stain (Abcam, Ab104139). Images were obtained using a Leica DM2500 Fluorescence microscopy system with a Leica DFC7000 T fluorescence color camera and Leica LAS X Multi Channel Acquisition software. Cardiomyocytes in cross-section that had centrally-located mCherry positive nuclei were quantified using ImageJ software, normalized to a 25 micron scale bar for each image. For quantification of infarcted myocardium, paraffin embedded 10 micron thick short-axis sections were stained with Masson Trichrome. ImageJ software was used to measure the areas of the infarct and myocardium.

**Quantification of cardiomyocyte cycling:** We quantified eGFP positive cardiomyocytes as previously described by immunohistochemistry with colorimetric detection using a Rabbit specific HRP/AEC detection kit (Abcam, Inc. Cat# ab64260). Images were obtained using a Leica DM2500 microscopy system with a Leica DFC7000 T fluorescence color camera or a Leica THUNDER imaging system and Leica LAS X Multi Channel Acquisition software. For fluorescence imaging, the channels were calibrated to background of control sections stained with secondary antibodies alone. eGFP+ cardiomyocytes visualized using an YFP filter and quantified from 6-8 ten-micron short axis sections of three slides per animal separated by ~400 microns per slide. The infarct zone was identified by WGA. The non-infarct zone was divided into thirds with the two regions adjacent to the infarct defined as the border zones and the middle

region defined as the remote zone. eGFP+ cardiomyocytes present in the same location on sequential slides were counted once among all sections to avoid over-representation of eGFP+ cells. Cardiomyocyte endoreplication was defined as single GFP+ cells, indicative of cell cycle reentry without replication, and proliferation as two neighboring GFP+ cardiomyocytes separated by cell membranes stained by WGA.

**TTC staining protocol.** Mice were given Heparin (1000 Units by intraperitoneal injection) ten minutes before administration of Isoflurane excision of hearts. Briefly, the descending aorta was cross-clamped and a small incision was made in the right atrium. Then, 500 ul of 30 mM KCl in 0.9% normal saline containing 100 Units per ml of Heparin was injected into the apex to stop the heart in diastole. Hearts were then cannulated *in vivo* using a 22 gauge blunt needle, dissected from the surrounding tissue, placed on a clamp stand, and slowly perfused with 300 ul of 30 mM KCl in normal saline. The LAD ligature was then rebuilt, and a one ml syringe containing phthalocyanine blue/saline solution (Copper (III) phthalocyanine (Sigma# 252980-5G) 5% (wt:vol) in 0.9% normal saline containing a drop of Dawn dish detergent) was attached to the cannulation needle and ~200 ul of the solution was used to gently perfuse the heart. The heart was then de-cannulated and washed in cold 0.9% normal saline. The atrial appendage and aorta were removed from the base of the heart and a cotton-tipped applicator was used to expel liquid from the ventricles. The heart was then placed in a Rat Heart Slicer Matrix (Zivic Instruments, Model # HSRS001-1) that contained 3%wt:vol low gelling agarose (Alfa Aesar, Inc, Catalog number J66319) at 42°C. Liquid agarose was then injected into the LV using a 3 ml syringe equipped with a 20 gauge needle. After the mold was filled with agarose, the mold containing the heart was placed in a -20°C freezer on the large steel block and the agarose was allowed to solidify for ~4 minutes. After the agarose was solidified, the heart was cut into 1 mm short-axis sections using microtome blades and each section was placed in an individual 1.5 ml Eppendorf

tube containing TTC solution (2,3,5-Triphenyltetrazolium chloride (TTC) (Sigma# T8877-10G) 1% (wt:vol) in 100mM Tris-base in 0.9% normal saline, pH 7.4), pre-warmed to 42°C. The heart slices were incubated at 42°C for 20 minutes. Then, each slice was transferred to an individual 1.5 ml Eppendorf tube containing 10% NBF for 60 minutes. Each slice was then removed, had excess buffer removed, and was weighed before imaging using a stereoscope. The AAR and AON were calculated as previously described.<sup>6</sup>

**RNA sequencing.** Twelve-week old male *αMHC-Cre::Fucci2aR* and *αMHC-Cre::Fucci2aR::DYRK1a<sup>fl/fl</sup>* mice underwent sham or I/R MI surgeries. Cardiomyocytes were isolated seven days after the surgeries (3 hearts per group, 12 hearts total). RNA extraction, cDNA library preparation with adapter ligation, and sequencing using an Illumina® HiSeq® system were performed by Genewiz, Inc. Sequence quality was determined by MultiQC and one sham *αMHC-Cre::Fucci2aR* set and one sham *αMHC-Cre::Fucci2aR::DYRK1a<sup>fl/fl</sup>* set was excluded because of overlap after PCA analyses. Differential gene expression was determined using R and DEseq2. Volcano plots were generated using Prism. Venn diagrams were generated using Bioinformatics & Evolutionary Genomics program (<http://bioinformatics.psb.ugent.be/webtools/Venn/>). Pathway analyses were performed using Reactome (<https://reactome.org/>)<sup>7</sup> and Enrichr (<https://maayanlab.cloud/Enrichr/>).<sup>8, 9</sup>

For analyses of gene expression data from Walsh<sup>10</sup>, et al, raw data were downloaded from GEO NCBI repository, accession number 17020. The data were subsequently subjected to quality control using lumi package (version 2.24.0) for the R programming language (<http://bioconductor.org/packages/release/bioc/html/lumi.html>). The data were then background-corrected, variance-stabilized, normalized and count matrix extracted using the same package. Then unexpressed genes were removed as well as entries not mapped to gene symbols. For

the heat map, genes with variance larger than 0.04 across all samples were extracted and the correlation heat map was produced using the R programming language. Clusters clearly separating the conditions were marked.

**Statistics:** GraphPad Prism 8 (GraphPad Software, Inc.) was used for statistical analyses. The data was analyzed for normal distribution using Anderson-Darling, D'Agostino & Pearson, Shapiro-Wilk, and Kolmogorov-Smirnov tests in GraphPad. When N was too small to determine normality, we performed the Mann-Whitney test for comparisons between two groups and Kruskal-Wallis for ANOVAs with a Dunn's multiple comparison test. Student's t-tests were used to calculate p-values of qPCR data. All mice that survived until the pre-specified endpoint of the experiments were used in the analyses. The number of mice used in experiments was based on our prior publication and a calculator from the IACUC at Boston University, including an Excel template for calculation based on means/standard deviations and proportions (<https://www.bu.edu/researchsupport/compliance/animal-care/working-with-animals/research/sample-size-calculations-iacuc/>). For the echocardiography experiments, we assumed a Type I (alpha) error of 0.05, a difference (delta) of ~30% (EF ~35% in the MI control group and ~25% in the DYRK1a knockout group), a standard deviation of 5%, and a Power of 0.95. We calculated that ~seven mice would be needed in each group. Representative figures were chosen based on the representative of the mean.

## Supplemental Material

### Online Supplemental Figure 1. Schematic of DYRK1a and the MuvB/Dream Complex.

**Online Supplemental Figure 2. DYRK1a is a potential regulator of postnatal cardiomyocyte growth.** **(A)** Heat map of gene expression using GSE17020 dataset from Walsh *et al.* showing seven clusters from embryonic, neonatal, and adult hearts. Genes in each cluster are provided in Supplemental Table I. **(B)** Molecular Signatures Database (MSigDB) Gene Set Enrichment analysis of genes corresponding to clusters 1-3 and 6-7. Gene set names, p-values, adjusted p-values, Odds Ratios, and combined scores from analyses using Enrichr are shown. **(C)** Analyses of pathway enrichment using Reactome are shown for genes corresponding to clusters 1-3 and 6-7. **(D)** Analysis of supplemental data from Talman *et al.* showing changes in the relative expression of 214 genes predicted to be regulated by the DREAM complex in P1, P4, P9, and P23 hearts. The genes predicted to be regulated by the DREAM complex were derived from Fisher *et al.* and are listed in Supplemental Table III. Values are the average counts for each gene at the denoted time points, normalized to each gene's expression at P1. **(E)** Quantitative PCR (qPCR) of the expression of seventeen transcripts corresponding to the MuvB/DREAM complex genes from C57B6J hearts isolated at P1, P3, P5, P7, P10, P14, P21, and P28. Values are means  $\pm$  SD for transcript expression of each gene normalized to 18S housekeeping gene expression. N=3 samples per time point using 2-9 pooled mouse hearts per sample.

**Online Supplemental Figure 3. Immunofluorescent and immunohistochemical staining of GFP positive cardiomyocytes of  $\alpha DKRC::RLTG$  mice.** **(A)** Immunofluorescent staining of

paraffin embedded heart from  $\alpha DKRC::RLTG$ . Anti-cardiac troponin (Red) and anti-GFP (Green) are shown. Scale bar (white) is 25 microns. **(B and C)** Isolated GFP+ cardiomyocyte from  $\alpha DKRC::RLTG$  showing bright field (B) and endogenous GFP signal (C). Scale bar (white) is 50 microns. **(D)** Immunohistochemical staining of eGFP+ cardiomyocytes from  $\alpha DKRC::RLTG$ . Cells stained with anti-GFP antibody are denoted by black arrows. The infarct and border zones are labeled. **(E)** Inset from panel D showing two neighboring eGFP positive cardiomyocytes denoted by black arrows. **(F - H)** Immunofluorescent staining of hearts of  $\alpha DKRC::RLTG$  mice treated with Harmine. Panel F shows two pairs of GFP positive cardiomyocytes in the border zone. Anti-GFP (green), wheat germ agglutinin (WGA) (red), and DAPI (blue) are shown. Scale bar (white) is 25 microns. Panels G and H show representative GFP positive cardiomyocytes. Anti-GFP (green), wheat germ agglutinin (WGA) (red), and DAPI (blue) are shown. Scale bar (white) is 25 microns.

**Online Supplemental Figure 4. Comparison of LVEF at four weeks after I/R MI in  $\alpha DKRC::RLTG/DTA$  and  $+:RLTG/DTA$  mice.** Comparison of  $\alpha DKRC::RLTG/DTA$  and  $+:RLTG/DTA$  littermate controls treated with harmine to previously published  $\alpha DKRC::DTA$  and  $+:DTA$  mice not treated with harmine (Bradley, L. et al. *Circ Res* (2021)). The absolute values (%) of left ventricular (LV) ejection fraction (EF) of mice are shown. Open circles are values for individual animals. Bars are group means  $\pm$  SD.  $p = 0.0001$  for  $+:RLTG/DTA$  (harmine-treated) vs.  $\alpha DKRC::RLTG/DTA$  (harmine-treated),  $p = 0.0001$  for  $+:DTA$  (no harmine) vs.  $\alpha DKRC::DTA$  (no harmine),  $p = 0.001$  for  $+:RLTG/DTA$  (harmine-treated) vs.  $+:DTA$  (no harmine), and  $p = 0.13$  for  $\alpha DKRC::RLTG/DTA$  (harmine-treated) vs.  $\alpha DKRC::DTA$  (no harmine). p-values were calculated by one-way ANOVA with Tukey's multiple comparison test.  $N = 7$  in the

*$\alpha$ DKRC::RLTG/DTA* (harmine-treated) group, N = 6 in the *+:RLTG/DTA* (harmine-treated), N = 6 in the  *$\alpha$ DKRC::DTA* (no harmine), and N = 8 in the *+:DTA* (no harmine) group.

**Online Supplemental Figure 5. Triphenyl Tetrazolium Chloride (TCC) staining of  *$\alpha$ MHC-Cre::Fucci2aR::DYRK1a<sup>flox/flox</sup>* and  *$\alpha$ MHC-Cre::Fucci2aR* animals after I/R MI. (A)** Overview of the experimental protocol for Triphenyl Tetrazolium Chloride (TCC) staining. **(B)** The Area-at-risk (AAR) and Area-of-necrosis (AON) for  *$\alpha$ MHC-Cre::Fucci2aR* (open bars) and  *$\alpha$ MHC-Cre::Fucci2aR::DYRK1a<sup>flox/flox</sup>* (gray bars). The values are weight (mg x 10<sup>-2</sup>) and expressed as the mean  $\pm$  SD. Open circles are individual animals. p=0.47 for the AAR  *$\alpha$ MHC-Cre::Fucci2aR::DYRK1a<sup>flox/flox</sup>* vs.  *$\alpha$ MHC-Cre::Fucci2aR* animals. p=0.19 for the AON  *$\alpha$ MHC-Cre::Fucci2aR::DYRK1a<sup>flox/flox</sup>* vs.  *$\alpha$ MHC-Cre::Fucci2aR* animals. P-values calculated by student's t-test. N=6 animals in the  *$\alpha$ MHC-Cre::Fucci2aR::DYRK1a<sup>flox/flox</sup>* group and N=4 animals in the  *$\alpha$ MHC-Cre::Fucci2aR* group. **(C)** Representative sections corresponding to panel D of  *$\alpha$ MHC-Cre::Fucci2aR* and  *$\alpha$ MHC-Cre::Fucci2aR::DYRK1a<sup>flox/flox</sup>* hearts stained with TTC. Blue stain corresponds to viable myocardium. Red stain corresponds to AAR. Pale beige stain corresponds to the AON.

**Online Supplemental Figure 6. Gene Ontology (GO) Biological Terms 2021 corresponding to differentially expressed genes identified from RNAseq.**

**Online Supplemental Figure 7. Heatmap of the eighty-nine genes unique to DYRK1a k/o cardiomyocytes after MI showing the expression of each gene in individual cardiomyocyte**

samples from Control Sham, Control MI, DYRK1a k/o Sham, and DYRK1a k/o MI. Red asterisks denote genes regulated by the DREAM complex (see Table III).

**Online Supplemental Figure 8.** Comparison of the MSigDB gene expression analyses for Clusters 1-3 of Supplemental Figure 2A and the eighty-nine genes unique to DYRK1a k/o cardiomyocytes after MI.

## Supplemental Figure 1

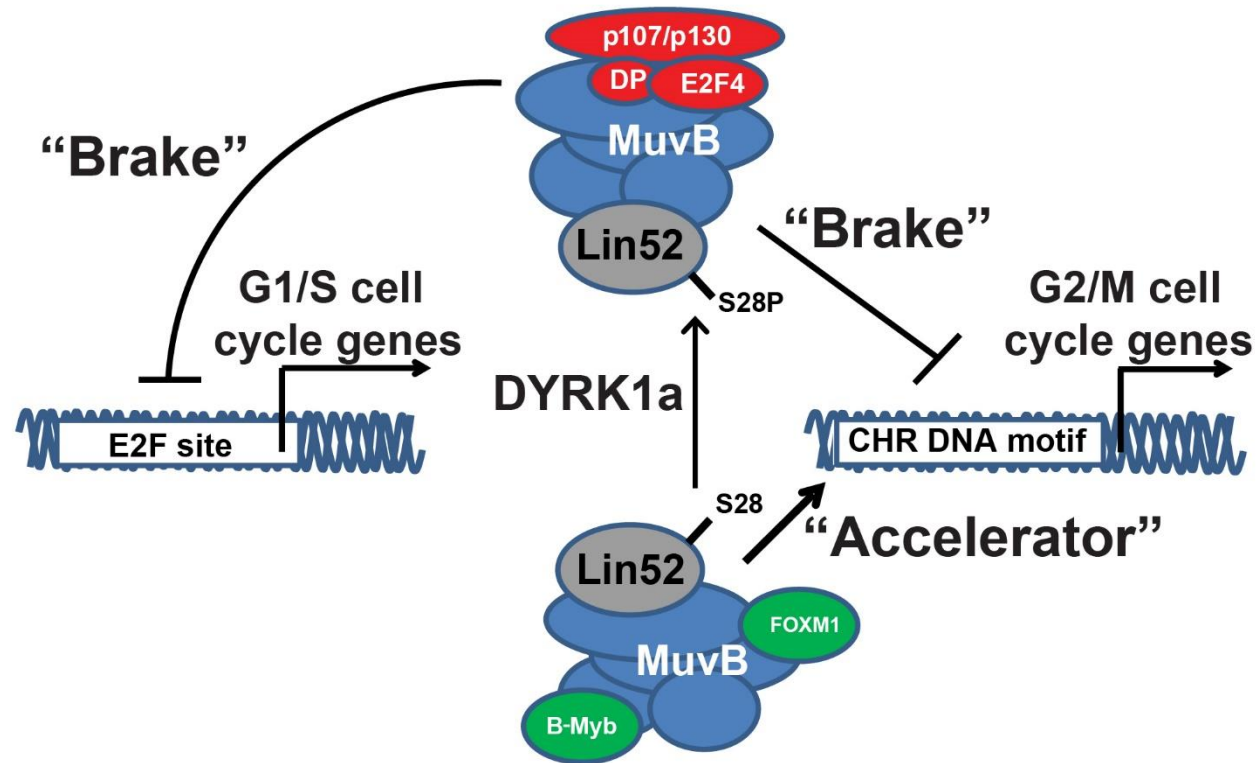

## Supplemental Figure 2

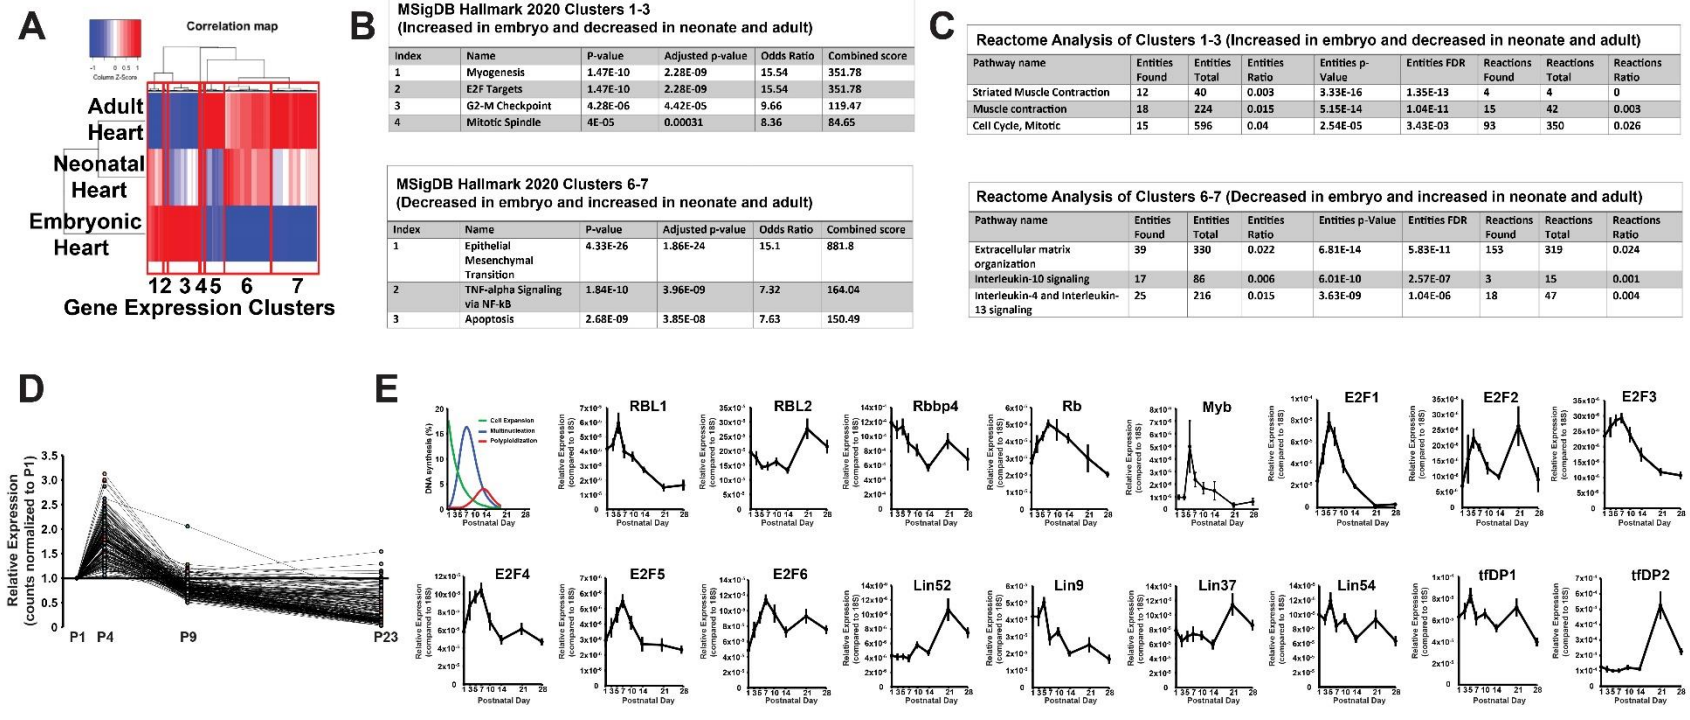

**Supplemental Figure 3**

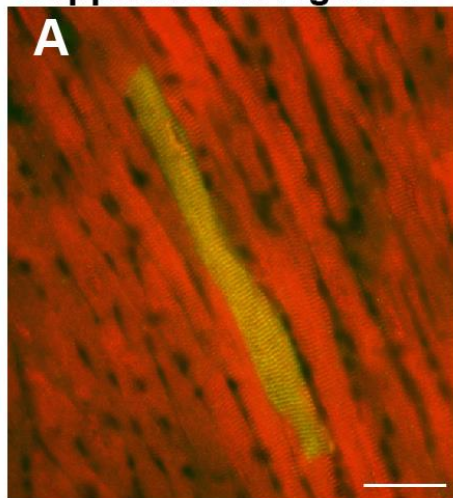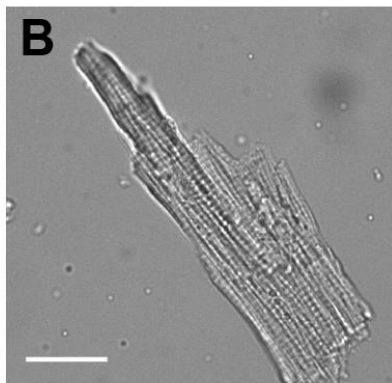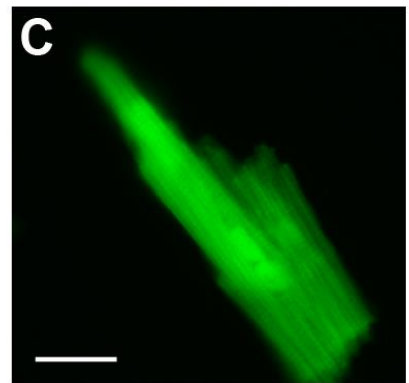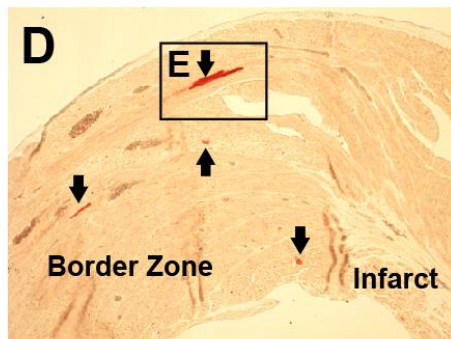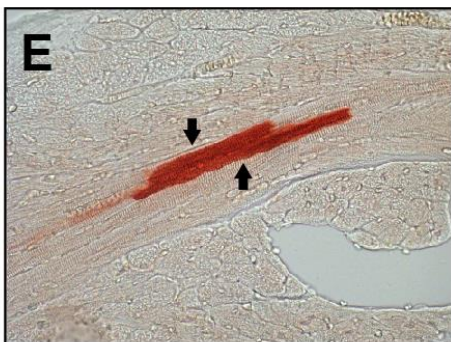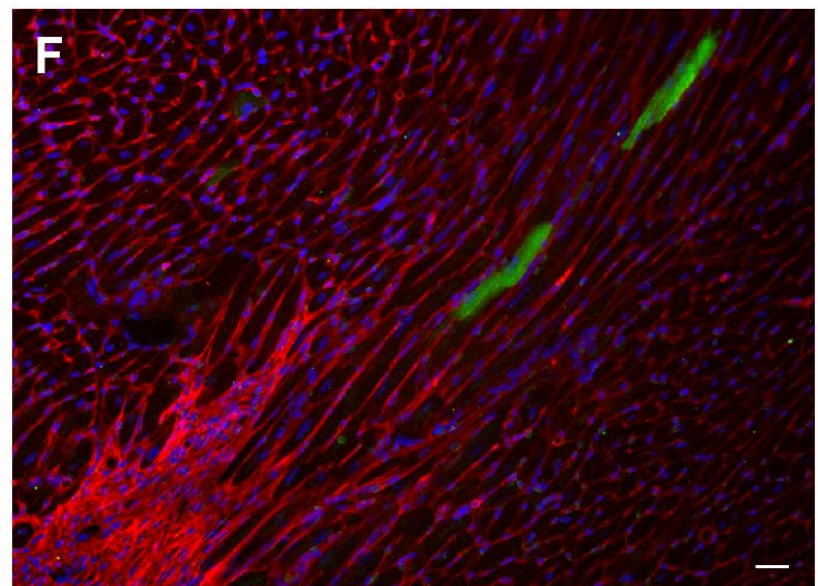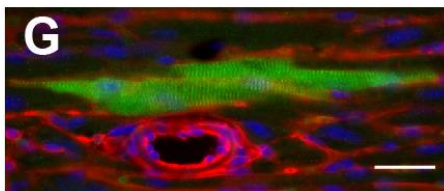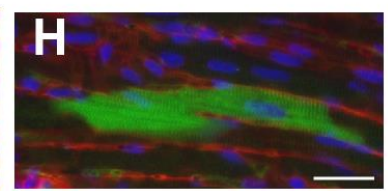

**Supplemental Figure 4**

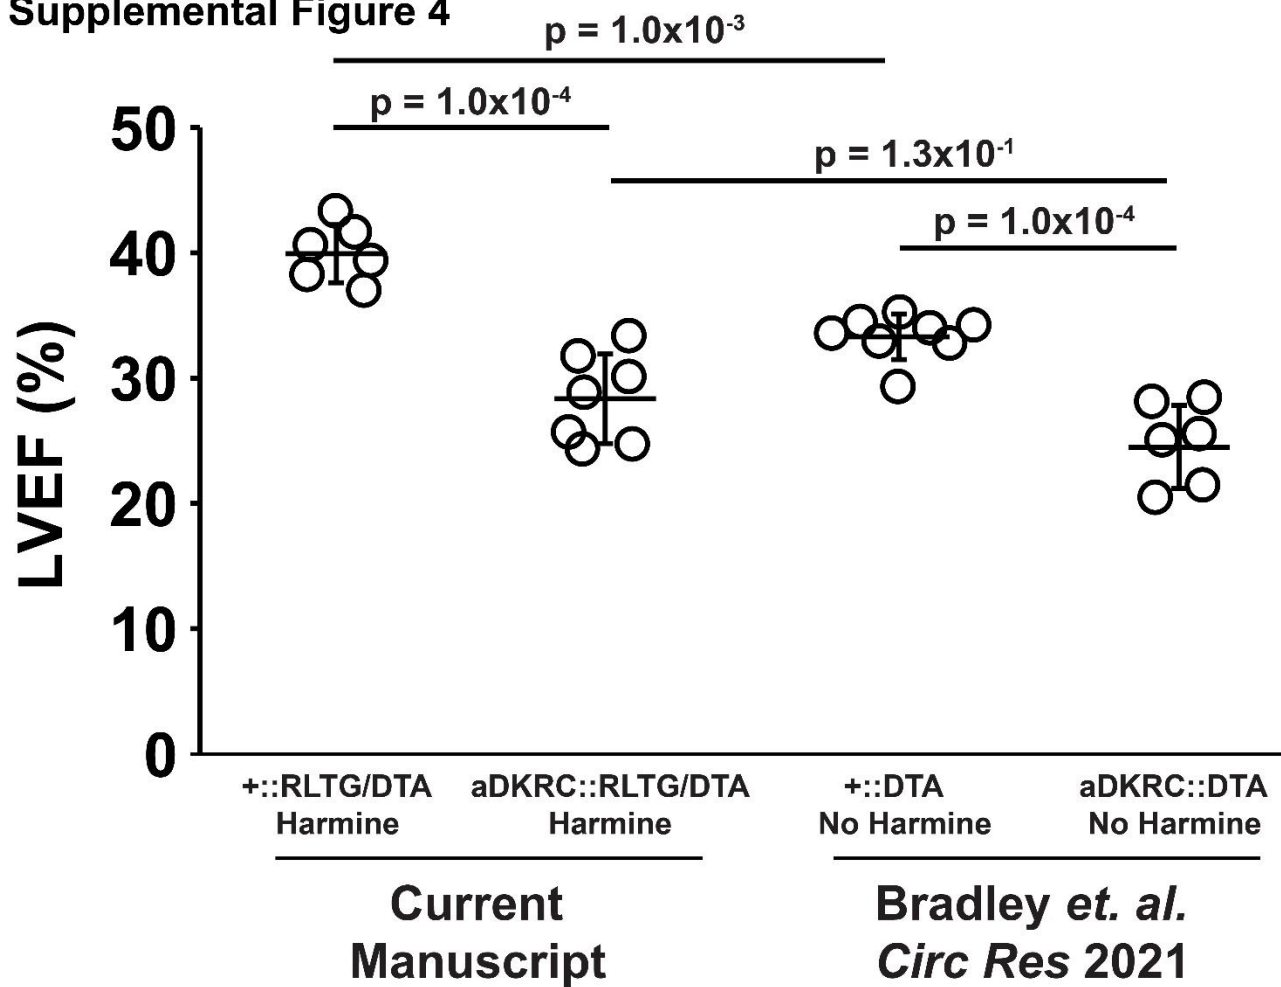

# Supplemental Figure 5

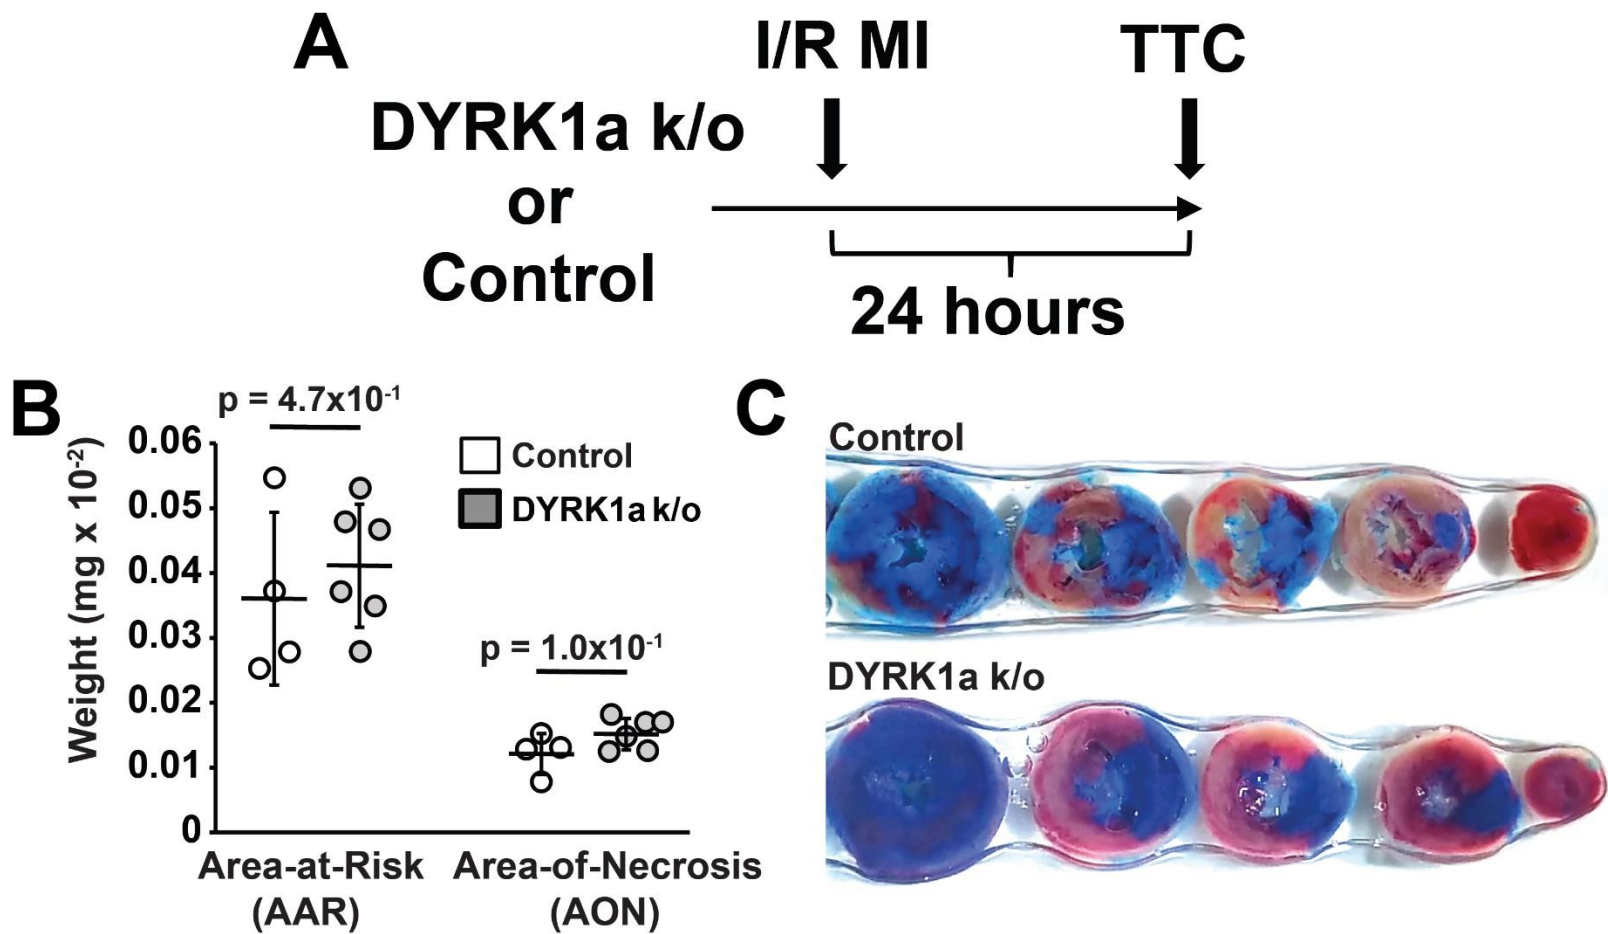

# Supplemental Figure 6

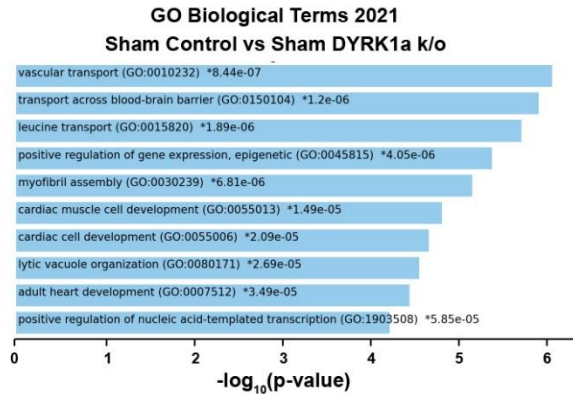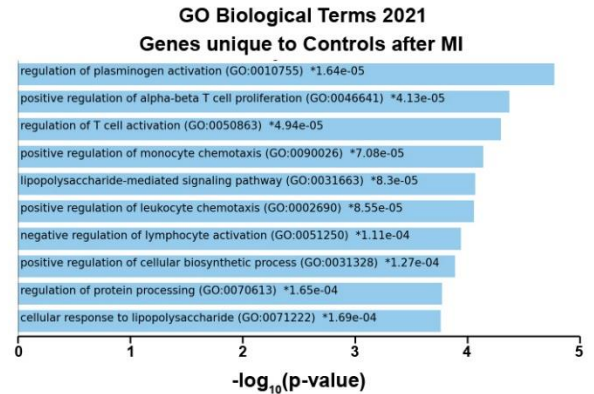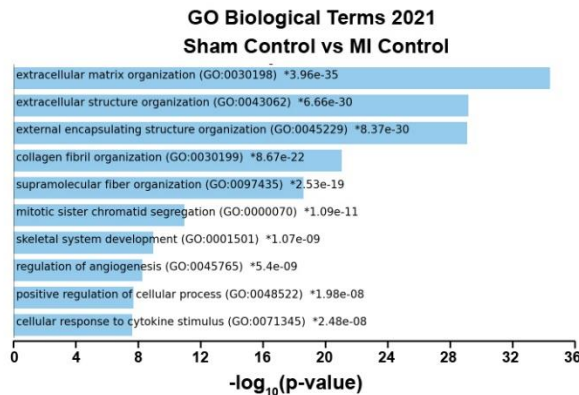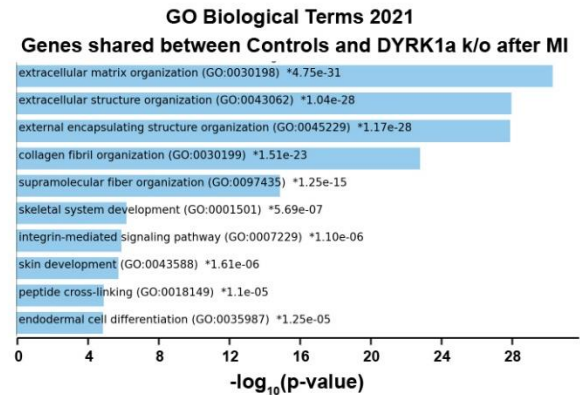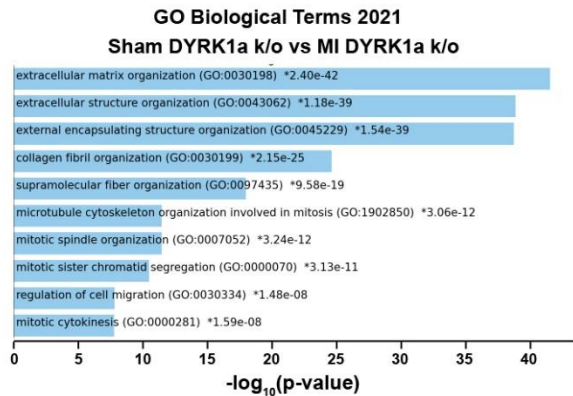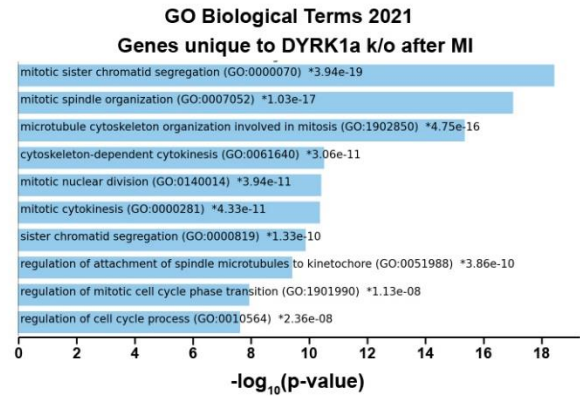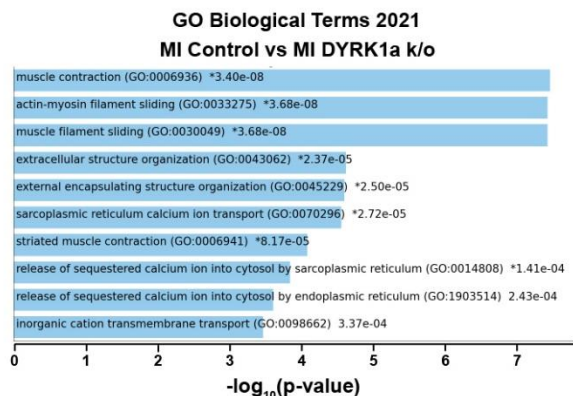

**Supplemental Figure 7**

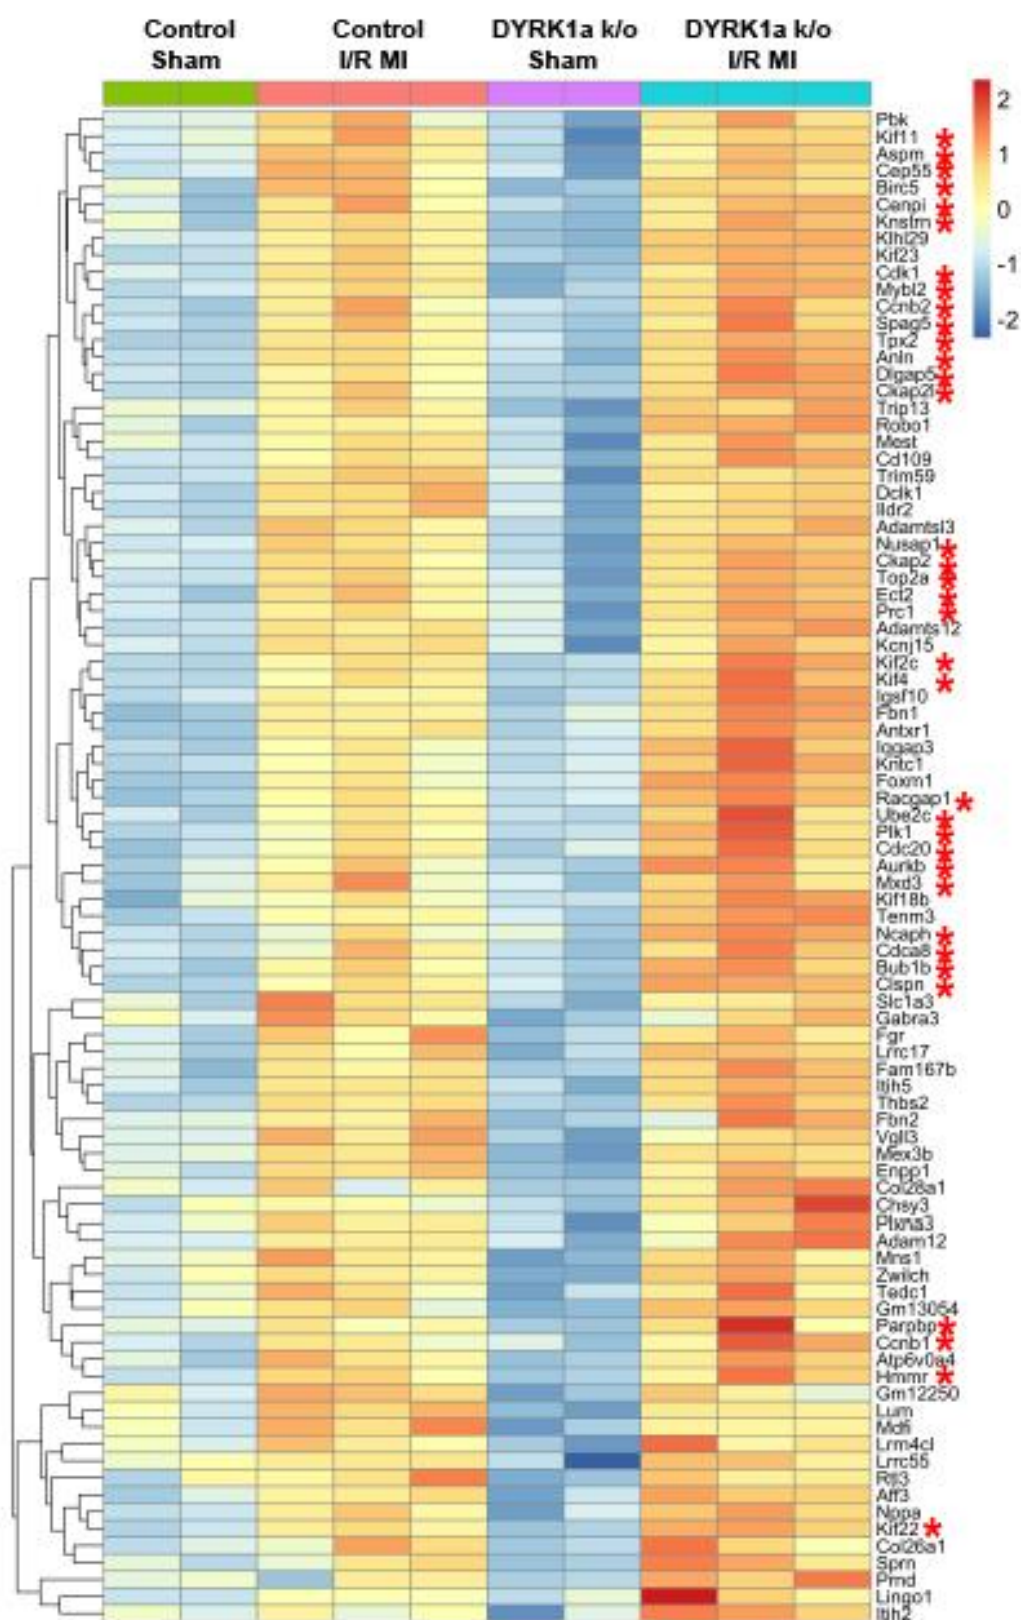

## Supplemental Figure 8

### **MsigDB Hallmark 2020 (Clusters 1-3 : Embryonic/Neonatal/Adult Hearts)**

| Index | Name            | P-value  | Adjusted p-value | Odds Ratio | Combined score |
|-------|-----------------|----------|------------------|------------|----------------|
| 1     | Myogenesis      | 1.47E-10 | 2.28E-09         | 15.54      | 351.78         |
| 2     | E2F Targets     | 1.47E-10 | 2.28E-09         | 15.54      | 351.78         |
| 3     | G2-M Checkpoint | 4.28E-06 | 4.42E-05         | 9.66       | 119.47         |
| 4     | Mitotic Spindle | 4E-05    | 0.00031          | 8.36       | 84.65          |

### **MsigDB Hallmark 2020 (Unique to DYRK1a k/o cardiomyocytes after MI)**

| Index | Name            | P-value  | Adjusted p-value | Odds Ratio | Combined score |
|-------|-----------------|----------|------------------|------------|----------------|
| 1     | G2-M Checkpoint | 2.58E-20 | 2.84E-19         | 29.59      | 1334.53        |
| 2     | E2F Targets     | 2.58E-20 | 2.84E-19         | 29.59      | 1334.53        |
| 3     | Mitotic Spindle | 1.86E-17 | 1.36E-16         | 25.59      | 985.99         |

## Supplemental Table 1

Gene clusters derived from NCBI Gene Expression Omnibus (GEO)  
<http://www.ncbi.nlm.nih.gov/geo/> Accession number GSE17020

| Cluster 1      | Cluster 2     | Cluster 3     | Cluster 4     | Cluster 5    | Cluster 6     | Cluster 7     |
|----------------|---------------|---------------|---------------|--------------|---------------|---------------|
| Actc1          | 1700006H03Rik | Nkx2-5        | A630052E07Rik | LOC100044430 | 1200009O22Rik | 1200002N14Rik |
| Actn2          | 2410076I21Rik | Nppb          | Actg2         | LOC100045680 | 1200016E24Rik | 2310043N10Rik |
| Capn6          | 3632451O06Rik | Pdlim5        | Col24a1       | LOC100047583 | 1500015O10Rik | 2310051E17Rik |
| Cdc20          | Alpk2         | Pkp2          | Cthrc1        | LOC100047628 | 4930533K18Rik | 9030024J15Rik |
| Cdca3          | Bmp7          | Plk1          | DLK1          | LOC100048554 | 5033414K04Rik | Abca8a        |
| Cdca8          | Cited1        | Popdc2        | Eln           | LOC433943    | 6330406I15Rik | Abca9         |
| Cdkn3          | Col2a1        | Ppargc1a      | Emid2         | LOC638301    | 9030425E11Rik | Acbd4         |
| Cox6a2         | Esrrg         | Ppp1r14c      | Nov           | LOC641240    | Adamts12      | Ace           |
| Eif2s3y        | Fbxw5         | Ppp1r1a       | Nrk           | LOC667277    | Adamts2       | Adamts13      |
| Eno3           | Got2          | Prox1         | Postn         | Lsamp        | Adamts4       | Adcyap1r1     |
| H19            | Hba-x         | Rragd         | Prss35        | Ly6a         | Antxr1        | Ahnak2        |
| Hist1h2ab      | Hbb-bh1       | Rrm2          | Slc38a5       | Ly6c1        | Anxa1         | Aldh1a1       |
| Hist1h2ad      | Hbb-y         | scl000959.1_2 | Stfa1         | Lyz2         | Aoc3          | Angptl1       |
| Hist1h2af      | Hspd1         | Scn5a         |               | Mgl2         | Atp2a3        | Angptl7       |
| Hist1h2ah      | LOC623031     | Sept6         |               | Mgst1        | B230343A10Rik | Anpep         |
| Hist1h2ak      | Rcan1         | Slc4a1        |               | Mmp3         | B3gnt9        | Apoe          |
| Hist1h2an      | Slitrk5       | Sox11         |               | Pcolce2      | Bgn           | Bcl2a1a       |
| Hspb7          |               | Spc25         |               | Podn         | Bicc1         | Bcl2a1b       |
| Igf2bp3        |               | Srpk3         |               | Ppap2b       | C1qtnf2       | Bcl6          |
| Kif22          |               | Synpo2l       |               | Ppl          | Camk2n1       | Blnk          |
| Kif23          |               | Tfric         |               | Ptgs2        | Ccdc3         | C1qa          |
| LOC100039888   |               | Tmod1         |               | Retnla       | Cd34          | C1qb          |
| LOC230899      |               | Tnni1         |               | Sod3         | Cd93          | C1qc          |
| LOC640739      |               | Tnni2         |               | Tmem195      | Cdc42ep5      | C1qtnf1       |
| Mest           |               | Tnnt1         |               | Tnfaip2      | Clip2         | C1qtnf5       |
| Mybphl         |               | Top2a         |               | Tnfsf13b     | Cnrip1        | C3            |
| Myh6           |               | Upp1          |               | Vit          | Col14a1       | Capg          |
| Myl3           |               |               |               | Xdh          | Col15a1       | Casp4         |
| Myl7           |               |               |               |              | Col1a1        | Cbr2          |
| Myoz2          |               |               |               |              | Col1a2        | Ccl2          |
| Nppa           |               |               |               |              | Col3a1        | Ccl3          |
| Nusap1         |               |               |               |              | Col5a2        | Ccl4          |
| Pgam2          |               |               |               |              | Col6a1        | Ccl7          |
| Prc1           |               |               |               |              | Col6a2        | Ccl9          |
| Rp23-480b19.10 |               |               |               |              | Col6a3        | Cd14          |
| Ryr2           |               |               |               |              | Coro1a        | Cd55          |
| Slc38a4        |               |               |               |              | Ctsk          | Cd83          |
| Smyd1          |               |               |               |              | Ctss          | Ch25h         |

|                |  |  |  |  |               |            |
|----------------|--|--|--|--|---------------|------------|
| <b>Spag5</b>   |  |  |  |  | Cxcl1         | Chrd       |
| <b>Spc24</b>   |  |  |  |  | Cygb          | Clec2d     |
| <b>Srl</b>     |  |  |  |  | Cyth4         | Col8a1     |
| <b>Stab1</b>   |  |  |  |  | Dcn           | Comp       |
| <b>Tmem108</b> |  |  |  |  | Dpt           | Cp         |
| <b>Tnnc1</b>   |  |  |  |  | E430002G05Rik | Crispld2   |
| <b>Tnni3</b>   |  |  |  |  | Ebf1          | Csf1r      |
| <b>Tnnt2</b>   |  |  |  |  | Ebf3          | Ctsa       |
| <b>Ttn</b>     |  |  |  |  | Emilin1       | Cxcl16     |
| <b>Uhrf1</b>   |  |  |  |  | Emp1          | Cyp1b1     |
| <b>Vash2</b>   |  |  |  |  | Emp3          | Cyp2d22    |
|                |  |  |  |  | Emr1          | D12Ert647e |
|                |  |  |  |  | Eng           | Dpep1      |
|                |  |  |  |  | Esam          | Ebf2       |
|                |  |  |  |  | Fap           | Ecm1       |
|                |  |  |  |  | Fbn1          | Efemp1     |
|                |  |  |  |  | Fcgrt         | Efhd1      |
|                |  |  |  |  | Fcrls         | EG245190   |
|                |  |  |  |  | Fer1l3        | EG630499   |
|                |  |  |  |  | Foxs1         | Egfr       |
|                |  |  |  |  | Galnt1        | Egr2       |
|                |  |  |  |  | Gdf10         | Entpd2     |
|                |  |  |  |  | Gja4          | Ephx1      |
|                |  |  |  |  | Heyl          | Fbln1      |
|                |  |  |  |  | Hic1          | Fbln2      |
|                |  |  |  |  | Higd1b        | Fcgr3      |
|                |  |  |  |  | Ifi27         | Fosb       |
|                |  |  |  |  | Igfbp4        | Fxyd5      |
|                |  |  |  |  | Igfbp7        | Gfpt2      |
|                |  |  |  |  | Irf8          | Gstm1      |
|                |  |  |  |  | Kcnk2         | Gstt3      |
|                |  |  |  |  | Laptm5        | H2-D1      |
|                |  |  |  |  | Leprel2       | Has1       |
|                |  |  |  |  | LOC100039175  | Hmgcs2     |
|                |  |  |  |  | LOC100048332  | Hs3st1     |
|                |  |  |  |  | LOC100048436  | Htra3      |
|                |  |  |  |  | LOC100048556  | Htra4      |
|                |  |  |  |  | LOC673251     | Icam1      |
|                |  |  |  |  | LOC98434      | Ifitm1     |
|                |  |  |  |  | Lox           | Ifitm3     |
|                |  |  |  |  | Lrrc17        | Igfbp3     |
|                |  |  |  |  | Ltbp2         | Igfbp6     |
|                |  |  |  |  | Lum           | Il1b       |

|  |  |  |  |  |         |              |
|--|--|--|--|--|---------|--------------|
|  |  |  |  |  | Man2a1  | Il33         |
|  |  |  |  |  | Matn4   | Il6          |
|  |  |  |  |  | Meox1   | Irak3        |
|  |  |  |  |  | Mfap4   | Islr         |
|  |  |  |  |  | Mfap5   | Itga11       |
|  |  |  |  |  | Mgp     | Itgbl1       |
|  |  |  |  |  | Mmp2    | Junb         |
|  |  |  |  |  | Mmp23   | Klf2         |
|  |  |  |  |  | Mrc1    | Klf4         |
|  |  |  |  |  | Mrc2    | Klf9         |
|  |  |  |  |  | Mrgprf  | Larp6        |
|  |  |  |  |  | Msc     | Lgals3       |
|  |  |  |  |  | Mustn1  | Lgals3bp     |
|  |  |  |  |  | Mxra7   | Lgals9       |
|  |  |  |  |  | Myh11   | LOC100044190 |
|  |  |  |  |  | Mylk    | LOC100045864 |
|  |  |  |  |  | Naalad2 | LOC674135    |
|  |  |  |  |  | Nfix    | Lrp1         |
|  |  |  |  |  | Nid1    | Lrrn4cl      |
|  |  |  |  |  | Notch1  | Ltbp4        |
|  |  |  |  |  | Ogn     | Lypd1        |
|  |  |  |  |  | Olfml1  | Mmp13        |
|  |  |  |  |  | Olfml3  | Mpeg1        |
|  |  |  |  |  | P2ry2   | Mxra8        |
|  |  |  |  |  | P2ry6   | Nfkbiz       |
|  |  |  |  |  | Parp3   | Ngfb         |
|  |  |  |  |  | Pcsk6   | Nupr1        |
|  |  |  |  |  | Pde1a   | Omd          |
|  |  |  |  |  | Pdgfra  | Osmr         |
|  |  |  |  |  | Pdgfrb  | Pde4b        |
|  |  |  |  |  | Pdgfrl  | Pdlim2       |
|  |  |  |  |  | Plat    | Pi16         |
|  |  |  |  |  | Pmp22   | Pla1a        |
|  |  |  |  |  | Prelp   | Plac9        |
|  |  |  |  |  | Ptgis   | Plscr4       |
|  |  |  |  |  | Ramp2   | Prg4         |
|  |  |  |  |  | Rarres2 | Pros1        |
|  |  |  |  |  | Rasl12  | Psmb8        |
|  |  |  |  |  | Rbp1    | Ptgir        |
|  |  |  |  |  | Rgma    | Ptx3         |
|  |  |  |  |  | Rgs5    | Rab3d        |
|  |  |  |  |  | Rhoj    | Rnase4       |
|  |  |  |  |  | S100a10 | S100a4       |

|  |  |  |  |  |                |           |
|--|--|--|--|--|----------------|-----------|
|  |  |  |  |  | S100a6         | Samd9l    |
|  |  |  |  |  | Scara3         | Scara5    |
|  |  |  |  |  | scl0003799.1_2 | Scd1      |
|  |  |  |  |  | Serpinf1       | Scn7a     |
|  |  |  |  |  | Sertad4        | Selplg    |
|  |  |  |  |  | Sfrp2          | Serpina3n |
|  |  |  |  |  | Slc43a3        | Serping1  |
|  |  |  |  |  | Sox9           | Slamf9    |
|  |  |  |  |  | Sparcl1        | Slc10a6   |
|  |  |  |  |  | Sphk1          | Slco2b1   |
|  |  |  |  |  | Srpx           | Smoc2     |
|  |  |  |  |  | Srpx2          | Srgn      |
|  |  |  |  |  | Sulf1          | Sult1a1   |
|  |  |  |  |  | Synpo          | Svep1     |
|  |  |  |  |  | Tek            | Tap2      |
|  |  |  |  |  | Tgfbr2         | Tgfbi     |
|  |  |  |  |  | Thbs2          | Tlr4      |
|  |  |  |  |  | Thy1           | Tmem100   |
|  |  |  |  |  | Tmod3          | Tmem204   |
|  |  |  |  |  | Tnxb           | Tmem45a   |
|  |  |  |  |  | Tpst1          | Tna       |
|  |  |  |  |  | Ttyh2          | Tppp3     |
|  |  |  |  |  | Twist2         | Trf       |
|  |  |  |  |  | Ybx3           | Ugt1a10   |
|  |  |  |  |  |                | Vgll3     |
|  |  |  |  |  |                | Wfdc1     |
|  |  |  |  |  |                | Wisp2     |

## Supplemental Table 2

List of genes with increased or decreased expression from DYRK1a k/o and Control Cardiomyocytes after I/R MI

| GENES<br>INCREASED<br>UNIQUE TO<br>CONTROL<br>AFTER I/R MI | GENES<br>INCREASED IN<br>COMMON<br>BETWEEN<br>CONTROL AND<br>DYRK1a K/O<br>AFTER I/R MI | GENES<br>INCREASED<br>UNIQUE TO<br>DYRK1A k/o<br>AFTER I/R<br>MI | GENES<br>DECREASE<br>D UNIQUE<br>TO<br>CONTROL<br>AFTER I/R<br>MI | GENES<br>DECREASE<br>D UNIQUE<br>TO DYRK1a<br>k/o AFTER<br>I/R MI |
|------------------------------------------------------------|-----------------------------------------------------------------------------------------|------------------------------------------------------------------|-------------------------------------------------------------------|-------------------------------------------------------------------|
| 4833412C05Rik                                              | 1500015O10Rik                                                                           | Adam12                                                           | Gm10108                                                           | Actn3                                                             |
| Aebp1                                                      | Abi3bp                                                                                  | Adamts12                                                         | Gm11808                                                           | Arg1                                                              |
| AL591207.1                                                 | Acan                                                                                    | Adamtsl3                                                         | Gm12033                                                           | Atp2a1                                                            |
| Aqp2                                                       | Adamts16                                                                                | Aff3                                                             | Gm15920                                                           | Car3                                                              |
| Arhgap22                                                   | Adamts2                                                                                 | Anln                                                             | Gm2225                                                            | Chil3                                                             |
| Bgn                                                        | Angptl7                                                                                 | Antxr1                                                           | Gm9385                                                            | Cyp1a1                                                            |
| C1qtnf6                                                    | Aspn                                                                                    | Aspm                                                             | Rpl10a-ps1                                                        | Ear2                                                              |
| Ccl12                                                      | C1qtnf3                                                                                 | Atp6v0a4                                                         |                                                                   | F7                                                                |
| Ccl5                                                       | Capn6                                                                                   | Aurkb                                                            |                                                                   | Gm12070                                                           |
| Ccl8                                                       | Ccna2                                                                                   | Birc5                                                            |                                                                   | Gm43281                                                           |
| Ccr2                                                       | Cemip                                                                                   | Bub1b                                                            |                                                                   | Lcn2                                                              |
| Cd24a                                                      | Cilp                                                                                    | Ccnb1                                                            |                                                                   | Mmp13                                                             |
| Cdca5                                                      | Cilp2                                                                                   | Ccnb2                                                            |                                                                   | Mybpc1                                                            |
| Cdh3                                                       | Col11a1                                                                                 | Cd109                                                            |                                                                   | Myh1                                                              |
| Cenpe                                                      | Col12a1                                                                                 | Cdc20                                                            |                                                                   | Myh2                                                              |
| Chaf1b                                                     | Col14a1                                                                                 | Cdca8                                                            |                                                                   | Myh4                                                              |
| Clec11a                                                    | Col16a1                                                                                 | Cdk1                                                             |                                                                   | Mylpf                                                             |
| Clec4n                                                     | Col1a1                                                                                  | Cenpi                                                            |                                                                   | Pvalb                                                             |
| Cyp26a1                                                    | Col1a2                                                                                  | Cep55                                                            |                                                                   | Retnla                                                            |
| Ddah1                                                      | Col22a1                                                                                 | Chsy3                                                            |                                                                   | Ryr1                                                              |
| Depdc1a                                                    | Col3a1                                                                                  | Ckap2                                                            |                                                                   | Tmem26                                                            |
| Dio3                                                       | Col5a1                                                                                  | Ckap2l                                                           |                                                                   | Tnnc2                                                             |
| Diras2                                                     | Col5a2                                                                                  | Clspn                                                            |                                                                   | Tnni2                                                             |
| Dnm3os                                                     | Col8a1                                                                                  | Col26a1                                                          |                                                                   | Tnnt3                                                             |
| Dok1                                                       | Col8a2                                                                                  | Col28a1                                                          |                                                                   | Xist                                                              |
| Esco2                                                      | Col9a2                                                                                  | Dclk1                                                            |                                                                   |                                                                   |
| Fam105a                                                    | Comp                                                                                    | Dlgap5                                                           |                                                                   |                                                                   |
| Fam83d                                                     | Crlf1                                                                                   | Ect2                                                             |                                                                   |                                                                   |
| Fcrls                                                      | Cthrc1                                                                                  | Enpp1                                                            |                                                                   |                                                                   |
| Fst                                                        | Cx3cr1                                                                                  | Fam167b                                                          |                                                                   |                                                                   |
| Gcnt4                                                      | Cxcl10                                                                                  | Fbn1                                                             |                                                                   |                                                                   |
| Gdf15                                                      | Dclk3                                                                                   | Fbn2                                                             |                                                                   |                                                                   |

|                  |        |         |  |  |  |  |
|------------------|--------|---------|--|--|--|--|
| <b>Gli2</b>      | Dkk3   | Fgr     |  |  |  |  |
| <b>Gm15867</b>   | Eln    | Foxm1   |  |  |  |  |
| <b>Gng8</b>      | Etv4   | Gabra3  |  |  |  |  |
| <b>H1fx</b>      | Fibin  | Gm12250 |  |  |  |  |
| <b>Hck</b>       | Fmod   | Gm13054 |  |  |  |  |
| <b>Il6</b>       | Fn1    | Hmmr    |  |  |  |  |
| <b>Islr2</b>     | Fndc1  | Igsf10  |  |  |  |  |
| <b>Kif15</b>     | Frem1  | Ildr2   |  |  |  |  |
| <b>Krt18</b>     | Frzb   | Iqgap3  |  |  |  |  |
| <b>Loxl1</b>     | Fstl1  | Itih2   |  |  |  |  |
| <b>Lrp8</b>      | Garem2 | Itih5   |  |  |  |  |
| <b>Lrrc25</b>    | Gdf6   | Kcnj15  |  |  |  |  |
| <b>Mfap2</b>     | Gm4841 | Kif11   |  |  |  |  |
| <b>Ms4a7</b>     | Gm4951 | Kif18b  |  |  |  |  |
| <b>Neil3</b>     | Gpr176 | Kif22   |  |  |  |  |
| <b>Ngef</b>      | Gpr39  | Kif23   |  |  |  |  |
| <b>Nkd2</b>      | Gxylt2 | Kif2c   |  |  |  |  |
| <b>Oas3</b>      | Ism1   | Kif4    |  |  |  |  |
| <b>Pif1</b>      | Itga11 | Klhl29  |  |  |  |  |
| <b>Pou2f2</b>    | Itgbl1 | Knstrn  |  |  |  |  |
| <b>Prrx2</b>     | Lox    | Kntc1   |  |  |  |  |
| <b>Ptpn22</b>    | Loxl3  | Lingo1  |  |  |  |  |
| <b>Ptprv</b>     | Ltbp2  | Lrrc17  |  |  |  |  |
| <b>Ptx3</b>      | Matn4  | Lrrc55  |  |  |  |  |
| <b>Rasal3</b>    | Mdk    | Lrrn4cl |  |  |  |  |
| <b>Rbp1</b>      | Melk   | Lum     |  |  |  |  |
| <b>Rflna</b>     | Mfap4  | Mdfi    |  |  |  |  |
| <b>Rhoh</b>      | Mfap5  | Mest    |  |  |  |  |
| <b>Runx1</b>     | Mki67  | Mex3b   |  |  |  |  |
| <b>Runx2</b>     | Myh7   | Mns1    |  |  |  |  |
| <b>Samsn1</b>    | Ncapg  | Mxd3    |  |  |  |  |
| <b>Serpina3i</b> | Nek2   | Mybl2   |  |  |  |  |
| <b>Serpina3n</b> | Nox4   | Ncaph   |  |  |  |  |
| <b>Serpinb1a</b> | Nuf2   | Nppa    |  |  |  |  |
| <b>Serpinb1c</b> | Nupr1  | Nusap1  |  |  |  |  |
| <b>Serpine1</b>  | P4ha3  | Parpbp  |  |  |  |  |
| <b>Serpine2</b>  | Pamr1  | Pbk     |  |  |  |  |
| <b>Serpinf1</b>  | Pclaf  | Plk1    |  |  |  |  |
| <b>Shcbp1</b>    | Pdgfrl | Plxna3  |  |  |  |  |
| <b>Siglece</b>   | Piezo2 | Prc1    |  |  |  |  |
| <b>Slc13a3</b>   | Pimreg | Prnd    |  |  |  |  |
| <b>Slfn10-ps</b> | Plac8  | Racgap1 |  |  |  |  |
| <b>Slitrk4</b>   | Postn  | Robo1   |  |  |  |  |
| <b>Srpx2</b>     | Ptn    | Rtl3    |  |  |  |  |

|                  |           |        |  |  |  |  |
|------------------|-----------|--------|--|--|--|--|
| <b>Ssc5d</b>     | Sertad4   | Slc1a3 |  |  |  |  |
| <b>Star</b>      | Sfrp1     | Spag5  |  |  |  |  |
| <b>Susd3</b>     | Sfrp2     | Sprn   |  |  |  |  |
| <b>Tmem119</b>   | Sox9      | Tedc1  |  |  |  |  |
| <b>Tmem45a</b>   | Spr1a     | Tenm3  |  |  |  |  |
| <b>Tnfaip8l2</b> | Stil      | Thbs2  |  |  |  |  |
| <b>Tpbg</b>      | Thbs1     | Top2a  |  |  |  |  |
| <b>Vav1</b>      | Thbs4     | Tpx2   |  |  |  |  |
| <b>Wfdc18</b>    | Timp1     | Trim59 |  |  |  |  |
| <b>Wscd2</b>     | Tnc       | Trip13 |  |  |  |  |
|                  | Tnfrsf11b | Ube2c  |  |  |  |  |
|                  | Wisp1     | Vgll3  |  |  |  |  |
|                  | Wisp2     | Zwilch |  |  |  |  |
|                  | Zfp185    |        |  |  |  |  |

### Supplemental Table 3

#### List of 214 Genes predicted to be regulated by the DREAM Complex

| Ensembl gene id     | Gene name | Description                                                                                           |
|---------------------|-----------|-------------------------------------------------------------------------------------------------------|
| ENSMUSG00000036777  | Anln      | anillin, actin binding protein [Source:MGI Symbol;Acc:MGI:1920174]                                    |
| ENSMUSG00000015749  | Anp32e    | acidic (leucine-rich) nuclear phosphoprotein 32 family, member E [Source:MGI Symbol;Acc:MGI:1913721]  |
| ENSMUSG00000041219  | Arhgap11a | Rho GTPase activating protein 11A [Source:MGI Symbol;Acc:MGI:2444300]                                 |
| ENSMUSG000000051517 | Arhgef39  | Rho guanine nucleotide exchange factor (GEF) 39 [Source:MGI Symbol;Acc:MGI:3036286]                   |
| ENSMUSG000000030654 | Arl6ip1   | ADP-ribosylation factor-like 6 interacting protein 1 [Source:MGI Symbol;Acc:MGI:1858943]              |
| ENSMUSG000000005470 | Asf1b     | anti-silencing function 1B histone chaperone [Source:MGI Symbol;Acc:MGI:1914179]                      |
| ENSMUSG000000033952 | Aspm      | asp (abnormal spindle)-like, microcephaly associated (Drosophila) [Source:MGI Symbol;Acc:MGI:1334448] |
| ENSMUSG000000022360 | Atad2     | ATPase family, AAA domain containing 2 [Source:MGI Symbol;Acc:MGI:1917722]                            |
| ENSMUSG000000027496 | Aurka     | aurora kinase A [Source:MGI Symbol;Acc:MGI:894678]                                                    |
| ENSMUSG000000020897 | Aurkb     | aurora kinase B [Source:MGI Symbol;Acc:MGI:107168]                                                    |
| ENSMUSG000000017716 | Birc5     | baculoviral IAP repeat-containing 5 [Source:MGI Symbol;Acc:MGI:1203517]                               |
| ENSMUSG000000030528 | Blm       | Bloom syndrome, RecQ helicase-like [Source:MGI Symbol;Acc:MGI:1328362]                                |
| ENSMUSG000000022070 | Bora      | bora, aurora kinase A activator [Source:MGI Symbol;Acc:MGI:1924994]                                   |
| ENSMUSG000000017146 | Brca1     | breast cancer 1, early onset [Source:MGI Symbol;Acc:MGI:104537]                                       |
| ENSMUSG000000034329 | Brip1     | BRCA1 interacting protein C-terminal helicase 1 [Source:MGI Symbol;Acc:MGI:2442836]                   |
| ENSMUSG000000027379 | Bub1      | BUB1, mitotic checkpoint serine/threonine kinase [Source:MGI Symbol;Acc:MGI:1100510]                  |
| ENSMUSG000000040084 | Bub1b     | BUB1B, mitotic checkpoint serine/threonine kinase [Source:MGI Symbol;Acc:MGI:1333889]                 |
| ENSMUSG000000066979 | Bub3      | BUB3 mitotic checkpoint protein [Source:MGI Symbol;Acc:MGI:1343463]                                   |
| ENSMUSG000000014226 | Cacybp    | calcyclin binding protein [Source:MGI Symbol;Acc:MGI:1270839]                                         |
| ENSMUSG000000029836 | Cbx3      | chromobox 3 [Source:MGI Symbol;Acc:MGI:108515]                                                        |
| ENSMUSG000000027160 | Ccdc34    | coiled-coil domain containing 34 [Source:MGI Symbol;Acc:MGI:1915451]                                  |
| ENSMUSG000000027715 | Ccna2     | cyclin A2 [Source:MGI Symbol;Acc:MGI:108069]                                                          |
| ENSMUSG000000041431 | Ccnb1     | cyclin B1 [Source:MGI Symbol;Acc:MGI:88302]                                                           |
| ENSMUSG000000032218 | Ccnb2     | cyclin B2 [Source:MGI Symbol;Acc:MGI:88311]                                                           |
| ENSMUSG000000024791 | Cdca5     | cell division cycle associated 5 [Source:MGI Symbol;Acc:MGI:1915099]                                  |

|                           |         |                                                                                                                              |
|---------------------------|---------|------------------------------------------------------------------------------------------------------------------------------|
| <b>ENSMUSG00000028873</b> | Cdca8   | cell division cycle associated 8 [Source:MGI Symbol;Acc:MGI:1196274]                                                         |
| <b>ENSMUSG00000019942</b> | Cdk1    | cyclin-dependent kinase 1 [Source:MGI Symbol;Acc:MGI:88351]                                                                  |
| <b>ENSMUSG00000096472</b> | Cdkn2d  | cyclin-dependent kinase inhibitor 2D (p19, inhibits CDK4) [Source:MGI Symbol;Acc:MGI:105387]                                 |
| <b>ENSMUSG00000037628</b> | Cdkn3   | cyclin-dependent kinase inhibitor 3 [Source:MGI Symbol;Acc:MGI:1919641]                                                      |
| <b>ENSMUSG00000006585</b> | Cdt1    | chromatin licensing and DNA replication factor 1 [Source:MGI Symbol;Acc:MGI:1914427]                                         |
| <b>ENSMUSG00000029177</b> | Cenpa   | centromere protein A [Source:MGI Symbol;Acc:MGI:88375]                                                                       |
| <b>ENSMUSG00000045328</b> | Cenpe   | centromere protein E [Source:MGI Symbol;Acc:MGI:1098230]                                                                     |
| <b>ENSMUSG00000026605</b> | Cenpf   | centromere protein F [Source:MGI Symbol;Acc:MGI:1313302]                                                                     |
| <b>ENSMUSG00000026708</b> | Cenpl   | centromere protein L [Source:MGI Symbol;Acc:MGI:1917704]                                                                     |
| <b>ENSMUSG00000031756</b> | Cenpn   | centromere protein N [Source:MGI Symbol;Acc:MGI:1919405]                                                                     |
| <b>ENSMUSG00000075266</b> | Cenpw   | centromere protein W [Source:MGI Symbol;Acc:MGI:1913561]                                                                     |
| <b>ENSMUSG00000068394</b> | Cep152  | centrosomal protein 152 [Source:MGI Symbol;Acc:MGI:2139083]                                                                  |
| <b>ENSMUSG00000046111</b> | Cep295  | centrosomal protein 295 [Source:MGI Symbol;Acc:MGI:2442521]                                                                  |
| <b>ENSMUSG00000024989</b> | Cep55   | centrosomal protein 55 [Source:MGI Symbol;Acc:MGI:1921357]                                                                   |
| <b>ENSMUSG00000002835</b> | Chaf1a  | chromatin assembly factor 1, subunit A (p150) [Source:MGI Symbol;Acc:MGI:1351331]                                            |
| <b>ENSMUSG00000032113</b> | Chek1   | checkpoint kinase 1 [Source:MGI Symbol;Acc:MGI:1202065]                                                                      |
| <b>ENSMUSG00000029521</b> | Chek2   | checkpoint kinase 2 [Source:MGI Symbol;Acc:MGI:1355321]                                                                      |
| <b>ENSMUSG00000029516</b> | Cit     | citron [Source:MGI Symbol;Acc:MGI:105313]                                                                                    |
| <b>ENSMUSG00000037725</b> | Ckap2   | cytoskeleton associated protein 2 [Source:MGI Symbol;Acc:MGI:1931797]                                                        |
| <b>ENSMUSG00000048327</b> | Ckap2l  | cytoskeleton associated protein 2-like [Source:MGI Symbol;Acc:MGI:1917716]                                                   |
| <b>ENSMUSG00000040549</b> | Ckap5   | cytoskeleton associated protein 5 [Source:MGI Symbol;Acc:MGI:1923036]                                                        |
| <b>ENSMUSG00000028044</b> | Cks1b   | CDC28 protein kinase 1b [Source:MGI Symbol;Acc:MGI:1889208]                                                                  |
| <b>ENSMUSG00000062248</b> | Cks2    | CDC28 protein kinase regulatory subunit 2 [Source:MGI Symbol;Acc:MGI:1913447]                                                |
| <b>ENSMUSG00000002718</b> | Cse1l   | chromosome segregation 1-like (S. cerevisiae) [Source:MGI Symbol;Acc:MGI:1339951]                                            |
| <b>ENSMUSG00000033411</b> | Ctdspl2 | CTD (carboxy-terminal domain, RNA polymerase II, polypeptide A) small phosphatase like 2 [Source:MGI Symbol;Acc:MGI:1196405] |
| <b>ENSMUSG00000029366</b> | Dck     | deoxycytidine kinase [Source:MGI Symbol;Acc:MGI:102726]                                                                      |
| <b>ENSMUSG00000024472</b> | Dcp2    | decapping mRNA 2 [Source:MGI Symbol;Acc:MGI:1917890]                                                                         |
| <b>ENSMUSG00000030641</b> | Ddias   | DNA damage-induced apoptosis suppressor [Source:MGI Symbol;Acc:MGI:1921291]                                                  |
| <b>ENSMUSG00000021377</b> | Dek     | DEK oncogene (DNA binding) [Source:MGI Symbol;Acc:MGI:1926209]                                                               |
| <b>ENSMUSG00000021697</b> | Depdc1b | DEP domain containing 1B [Source:MGI Symbol;Acc:MGI:2145425]                                                                 |

|                           |        |                                                                                                                               |
|---------------------------|--------|-------------------------------------------------------------------------------------------------------------------------------|
| <b>ENSMUSG00000021707</b> | Dhfr   | dihydrofolate reductase [Source:MGI Symbol;Acc:MGI:94890]                                                                     |
| <b>ENSMUSG00000037544</b> | Dlgap5 | discs, large (Drosophila) homolog-associated protein 5 [Source:MGI Symbol;Acc:MGI:2183453]                                    |
| <b>ENSMUSG00000027490</b> | E2f1   | E2F transcription factor 1 [Source:MGI Symbol;Acc:MGI:101941]                                                                 |
| <b>ENSMUSG00000027699</b> | Ect2   | ect2 oncogene [Source:MGI Symbol;Acc:MGI:95281]                                                                               |
| <b>ENSMUSG00000051220</b> | Ercc6l | excision repair cross-complementing rodent repair deficiency complementation group 6 like [Source:MGI Symbol;Acc:MGI:2654144] |
| <b>ENSMUSG00000022034</b> | Esco2  | establishment of sister chromatid cohesion N-acetyltransferase 2 [Source:MGI Symbol;Acc:MGI:1919238]                          |
| <b>ENSMUSG00000058290</b> | Espl1  | extra spindle pole bodies 1, separase [Source:MGI Symbol;Acc:MGI:2146156]                                                     |
| <b>ENSMUSG00000039748</b> | Exo1   | exonuclease 1 [Source:MGI Symbol;Acc:MGI:1349427]                                                                             |
| <b>ENSMUSG00000027752</b> | Exosc8 | exosome component 8 [Source:MGI Symbol;Acc:MGI:1916889]                                                                       |
| <b>ENSMUSG00000029687</b> | Ezh2   | enhancer of zeste 2 polycomb repressive complex 2 subunit [Source:MGI Symbol;Acc:MGI:107940]                                  |
| <b>ENSMUSG00000020808</b> | Fam64a | family with sequence similarity 64, member A [Source:MGI Symbol;Acc:MGI:1924434]                                              |
| <b>ENSMUSG00000027654</b> | Fam83d | family with sequence similarity 83, member D [Source:MGI Symbol;Acc:MGI:1919128]                                              |
| <b>ENSMUSG00000032815</b> | Fanca  | Fanconi anemia, complementation group A [Source:MGI Symbol;Acc:MGI:1341823]                                                   |
| <b>ENSMUSG00000047757</b> | Fancb  | Fanconi anemia, complementation group B [Source:MGI Symbol;Acc:MGI:2448558]                                                   |
| <b>ENSMUSG00000034023</b> | Fancd2 | Fanconi anemia, complementation group D2 [Source:MGI Symbol;Acc:MGI:2448480]                                                  |
| <b>ENSMUSG00000039187</b> | Fanci  | Fanconi anemia, complementation group I [Source:MGI Symbol;Acc:MGI:2384790]                                                   |
| <b>ENSMUSG00000004018</b> | Fancl  | Fanconi anemia, complementation group L [Source:MGI Symbol;Acc:MGI:1914280]                                                   |
| <b>ENSMUSG00000055884</b> | Fancm  | Fanconi anemia, complementation group M [Source:MGI Symbol;Acc:MGI:2442306]                                                   |
| <b>ENSMUSG00000019773</b> | Fbxo5  | F-box protein 5 [Source:MGI Symbol;Acc:MGI:1914391]                                                                           |
| <b>ENSMUSG00000024742</b> | Fen1   | flap structure specific endonuclease 1 [Source:MGI Symbol;Acc:MGI:102779]                                                     |
| <b>ENSMUSG00000020235</b> | Fzr1   | fizzy/cell division cycle 20 related 1 (Drosophila) [Source:MGI Symbol;Acc:MGI:1926790]                                       |
| <b>ENSMUSG00000035293</b> | G2e3   | G2/M-phase specific E3 ubiquitin ligase [Source:MGI Symbol;Acc:MGI:2444298]                                                   |
| <b>ENSMUSG00000074802</b> | Gas2l3 | growth arrest-specific 2 like 3 [Source:MGI Symbol;Acc:MGI:1918780]                                                           |
| <b>ENSMUSG00000027454</b> | Gins1  | GIN5 complex subunit 1 (Psf1 homolog) [Source:MGI Symbol;Acc:MGI:1916520]                                                     |
| <b>ENSMUSG00000031821</b> | Gins2  | GIN5 complex subunit 2 (Psf2 homolog) [Source:MGI Symbol;Acc:MGI:1921019]                                                     |
| <b>ENSMUSG00000027883</b> | Gpsm2  | G-protein signalling modulator 2 (AGS3-like, C. elegans) [Source:MGI Symbol;Acc:MGI:1923373]                                  |
| <b>ENSMUSG00000050107</b> | Gsg2   | germ cell associated 2, haspin [Source:MGI Symbol;Acc:MGI:1194498]                                                            |
| <b>ENSMUSG00000022385</b> | Gtse1  | G two S phase expressed protein 1 [Source:MGI Symbol;Acc:MGI:1352755]                                                         |
| <b>ENSMUSG00000049932</b> | H2afx  | H2A histone family, member X [Source:MGI Symbol;Acc:MGI:102688]                                                               |

|                           |           |                                                                                  |
|---------------------------|-----------|----------------------------------------------------------------------------------|
| <b>ENSMUSG00000037894</b> | H2afz     | H2A histone family, member Z [Source:MGI Symbol;Acc:MGI:1888388]                 |
| <b>ENSMUSG00000038047</b> | Haus6     | HAUS augmin-like complex, subunit 6 [Source:MGI Symbol;Acc:MGI:1923389]          |
| <b>ENSMUSG00000035439</b> | Haus8     | 4HAUS augmin-like complex, subunit 8 [Source:MGI Symbol;Acc:MGI:1923728]         |
| <b>ENSMUSG00000064168</b> | Hist1h2bh | histone cluster 1, H2bh [Source:MGI Symbol;Acc:MGI:2448387]                      |
| <b>ENSMUSG00000096807</b> | Hist1h2bm | histone cluster 1, H2bm [Source:MGI Symbol;Acc:MGI:2448404]                      |
| <b>ENSMUSG00000069310</b> | Hist1h3c  | histone cluster 1, H3c [Source:MGI Symbol;Acc:MGI:2448320]                       |
| <b>ENSMUSG00000099583</b> | Hist1h3d  | histone cluster 1, H3d [Source:MGI Symbol;Acc:MGI:2448322]                       |
| <b>ENSMUSG00000060678</b> | Hist1h4c  | histone cluster 1, H4c [Source:MGI Symbol;Acc:MGI:2448421]                       |
| <b>ENSMUSG00000063689</b> | Hist2h2ab | histone cluster 2, H2ab [Source:MGI Symbol;Acc:MGI:2448314]                      |
| <b>ENSMUSG00000044783</b> | Hjrp      | Holliday junction recognition protein [Source:MGI Symbol;Acc:MGI:2685821]        |
| <b>ENSMUSG00000054717</b> | Hmgb2     | high mobility group box 2 [Source:MGI Symbol;Acc:MGI:96157]                      |
| <b>ENSMUSG00000020330</b> | Hmmr      | hyaluronan mediated motility receptor (RHAMM) [Source:MGI Symbol;Acc:MGI:104667] |
| <b>ENSMUSG00000007836</b> | Hnrnpa0   | heterogeneous nuclear ribonucleoprotein A0 [Source:MGI Symbol;Acc:MGI:1924384]   |
| <b>ENSMUSG00000004980</b> | Hnrnpa2b1 | heterogeneous nuclear ribonucleoprotein A2/B1 [Source:MGI Symbol;Acc:MGI:104819] |
| <b>ENSMUSG00000027778</b> | Ift80     | intraflagellar transport 80 [Source:MGI Symbol;Acc:MGI:1915509]                  |
| <b>ENSMUSG00000024660</b> | Incenp    | inner centromere protein [Source:MGI Symbol;Acc:MGI:1313288]                     |
| <b>ENSMUSG00000012443</b> | Kif11     | kinesin family member 11 [Source:MGI Symbol;Acc:MGI:1098231]                     |
| <b>ENSMUSG00000041498</b> | Kif14     | kinesin family member 14 [Source:MGI Symbol;Acc:MGI:1098226]                     |
| <b>ENSMUSG00000036768</b> | Kif15     | kinesin family member 15 [Source:MGI Symbol;Acc:MGI:1098258]                     |
| <b>ENSMUSG00000027115</b> | Kif18a    | kinesin family member 18A [Source:MGI Symbol;Acc:MGI:2446977]                    |
| <b>ENSMUSG00000024795</b> | Kif20b    | kinesin family member 20B [Source:MGI Symbol;Acc:MGI:2444576]                    |
| <b>ENSMUSG00000030677</b> | Kif22     | kinesin family member 22 [Source:MGI Symbol;Acc:MGI:109233]                      |
| <b>ENSMUSG00000028678</b> | Kif2c     | kinesin family member 2C [Source:MGI Symbol;Acc:MGI:1921054]                     |
| <b>ENSMUSG00000079553</b> | Kifc1     | kinesin family member C1 [Source:MGI Symbol;Acc:MGI:109596]                      |
| <b>ENSMUSG00000027326</b> | Kn11      | kinetochore scaffold 1 [Source:MGI Symbol;Acc:MGI:1923714]                       |
| <b>ENSMUSG00000027331</b> | Knstrn    | kinetochore-localized astrin/SPAG5 binding [Source:MGI Symbol;Acc:MGI:1289298]   |
| <b>ENSMUSG00000018362</b> | Kpna2     | karyopherin (importin) alpha 2 [Source:MGI Symbol;Acc:MGI:103561]                |
| <b>ENSMUSG00000001440</b> | Kpnb1     | karyopherin (importin) beta 1 [Source:MGI Symbol;Acc:MGI:107532]                 |
| <b>ENSMUSG00000035310</b> | Lin54     | lin-54 homolog (C. elegans) [Source:MGI Symbol;Acc:MGI:2140902]                  |

|                            |          |                                                                                                         |
|----------------------------|----------|---------------------------------------------------------------------------------------------------------|
| <b>ENSMUSG00000058729</b>  | Lin9     | lin-9 homolog (C. elegans) [Source:MGI Symbol;Acc:MGI:1919818]                                          |
| <b>ENSMUSG00000024590</b>  | Lmnb1    | lamin B1 [Source:MGI Symbol;Acc:MGI:96795]                                                              |
| <b>ENSMUSG00000029910</b>  | Mad2l1   | MAD2 mitotic arrest deficient-like 1 [Source:MGI Symbol;Acc:MGI:1860374]                                |
| <b>ENSMUSG00000026779</b>  | Mastl    | microtubule associated serine/threonine kinase-like [Source:MGI Symbol;Acc:MGI:1914371]                 |
| <b>ENSMUSG00000002870</b>  | Mcm2     | minichromosome maintenance complex component 2 [Source:MGI Symbol;Acc:MGI:105380]                       |
| <b>ENSMUSG000000041859</b> | Mcm3     | minichromosome maintenance complex component 3 [Source:MGI Symbol;Acc:MGI:101845]                       |
| <b>ENSMUSG00000022673</b>  | Mcm4     | minichromosome maintenance complex component 4 [Source:MGI Symbol;Acc:MGI:103199]                       |
| <b>ENSMUSG00000005410</b>  | Mcm5     | minichromosome maintenance complex component 5 [Source:MGI Symbol;Acc:MGI:103197]                       |
| <b>ENSMUSG00000026355</b>  | Mcm6     | minichromosome maintenance complex component 6 [Source:MGI Symbol;Acc:MGI:1298227]                      |
| <b>ENSMUSG00000029730</b>  | Mcm7     | minichromosome maintenance complex component 7 [Source:MGI Symbol;Acc:MGI:1298398]                      |
| <b>ENSMUSG00000027353</b>  | Mcm8     | minichromosome maintenance 8 homologous recombination repair factor [Source:MGI Symbol;Acc:MGI:1913884] |
| <b>ENSMUSG000000061607</b> | Mdc1     | mediator of DNA damage checkpoint 1 [Source:MGI Symbol;Acc:MGI:3525201]                                 |
| <b>ENSMUSG00000035683</b>  | Melk     | maternal embryonic leucine zipper kinase [Source:MGI Symbol;Acc:MGI:106924]                             |
| <b>ENSMUSG000000047534</b> | Mis18bp1 | MIS18 binding protein 1 [Source:MGI Symbol;Acc:MGI:2145099]                                             |
| <b>ENSMUSG000000031004</b> | Mki67    | antigen identified by monoclonal antibody Ki 67 [Source:MGI Symbol;Acc:MGI:106035]                      |
| <b>ENSMUSG00000005370</b>  | Msh6     | mutS homolog 6 [Source:MGI Symbol;Acc:MGI:1343961]                                                      |
| <b>ENSMUSG00000021485</b>  | Mxd3     | Max dimerization protein 3 [Source:MGI Symbol;Acc:MGI:104987]                                           |
| <b>ENSMUSG000000019982</b> | Myb      | myeloblastosis oncogene [Source:MGI Symbol;Acc:MGI:97249]                                               |
| <b>ENSMUSG000000033186</b> | Mzt1     | mitotic spindle organizing protein 1 [Source:MGI Symbol;Acc:MGI:1924039]                                |
| <b>ENSMUSG00000028693</b>  | Nasp     | nuclear autoantigenic sperm protein (histone-binding) [Source:MGI Symbol;Acc:MGI:1355328]               |
| <b>ENSMUSG00000038252</b>  | Ncapd2   | non-SMC condensin I complex, subunit D2 [Source:MGI Symbol;Acc:MGI:1915548]                             |
| <b>ENSMUSG00000035024</b>  | Ncapd3   | non-SMC condensin II complex, subunit D3 [Source:MGI Symbol;Acc:MGI:2142989]                            |
| <b>ENSMUSG000000015880</b> | Ncapg    | non-SMC condensin I complex, subunit G [Source:MGI Symbol;Acc:MGI:1930197]                              |
| <b>ENSMUSG000000042029</b> | Ncapg2   | non-SMC condensin II complex, subunit G2 [Source:MGI Symbol;Acc:MGI:1923294]                            |
| <b>ENSMUSG00000034906</b>  | Ncaph    | non-SMC condensin I complex, subunit H [Source:MGI Symbol;Acc:MGI:2444777]                              |
| <b>ENSMUSG00000028614</b>  | Ndc1     | NDC1 transmembrane nucleoporin [Source:MGI Symbol;Acc:MGI:1920037]                                      |
| <b>ENSMUSG00000024056</b>  | Ndc80    | NDC80 kinetochore complex component [Source:MGI Symbol;Acc:MGI:1914302]                                 |
| <b>ENSMUSG00000039396</b>  | Neil3    | nei like 3 (E. coli) [Source:MGI Symbol;Acc:MGI:2384588]                                                |
| <b>ENSMUSG00000026622</b>  | Nek2     | NIMA (never in mitosis gene a)-related expressed kinase 2 [Source:MGI Symbol;Acc:MGI:109359]            |
| <b>ENSMUSG00000026020</b>  | Nop58    | NOP58 ribonucleoprotein [Source:MGI Symbol;Acc:MGI:1933184]                                             |

|                           |         |                                                                                                   |
|---------------------------|---------|---------------------------------------------------------------------------------------------------|
| <b>ENSMUSG00000026434</b> | Nucks1  | nuclear casein kinase and cyclin-dependent kinase substrate 1 [Source:MGI Symbol;Acc:MGI:1934811] |
| <b>ENSMUSG00000026683</b> | Nuf2    | NUF2, NDC80 kinetochore complex component [Source:MGI Symbol;Acc:MGI:1914227]                     |
| <b>ENSMUSG00000052798</b> | Nup107  | nucleoporin 107 [Source:MGI Symbol;Acc:MGI:2143854]                                               |
| <b>ENSMUSG00000038759</b> | Nup205  | nucleoporin 205 [Source:MGI Symbol;Acc:MGI:2141625]                                               |
| <b>ENSMUSG00000020739</b> | Nup85   | nucleoporin 85 [Source:MGI Symbol;Acc:MGI:3046173]                                                |
| <b>ENSMUSG00000027306</b> | Nusap1  | nucleolar and spindle associated protein 1 [Source:MGI Symbol;Acc:MGI:2675669]                    |
| <b>ENSMUSG00000072980</b> | Oip5    | Opa interacting protein 5 [Source:MGI Symbol;Acc:MGI:1917895]                                     |
| <b>ENSMUSG00000028587</b> | Orc1    | origin recognition complex, subunit 1 [Source:MGI Symbol;Acc:MGI:1328337]                         |
| <b>ENSMUSG00000044702</b> | Palb2   | partner and localizer of BRCA2 [Source:MGI Symbol;Acc:MGI:3040695]                                |
| <b>ENSMUSG00000035365</b> | Parbp   | PARP1 binding protein [Source:MGI Symbol;Acc:MGI:1922567]                                         |
| <b>ENSMUSG00000026873</b> | Phf19   | PHD finger protein 19 [Source:MGI Symbol;Acc:MGI:1921266]                                         |
| <b>ENSMUSG00000041064</b> | Pif1    | PIF1 5'-to-3' DNA helicase [Source:MGI Symbol;Acc:MGI:2143057]                                    |
| <b>ENSMUSG00000030867</b> | Plk1    | polo-like kinase 1 [Source:MGI Symbol;Acc:MGI:97621]                                              |
| <b>ENSMUSG00000025758</b> | Plk4    | polo-like kinase 4 [Source:MGI Symbol;Acc:MGI:101783]                                             |
| <b>ENSMUSG00000023345</b> | Poc1a   | POC1 centriolar protein A [Source:MGI Symbol;Acc:MGI:1917485]                                     |
| <b>ENSMUSG00000038644</b> | Pold1   | polymerase (DNA directed), delta 1, catalytic subunit [Source:MGI Symbol;Acc:MGI:97741]           |
| <b>ENSMUSG00000030726</b> | Pold3   | polymerase (DNA-directed), delta 3, accessory subunit [Source:MGI Symbol;Acc:MGI:1915217]         |
| <b>ENSMUSG00000007080</b> | Pole    | polymerase (DNA directed), epsilon [Source:MGI Symbol;Acc:MGI:1196391]                            |
| <b>ENSMUSG00000034206</b> | Polq    | polymerase (DNA directed), theta [Source:MGI Symbol;Acc:MGI:2155399]                              |
| <b>ENSMUSG00000060288</b> | Ppih    | peptidyl prolyl isomerase H [Source:MGI Symbol;Acc:MGI:106499]                                    |
| <b>ENSMUSG00000038943</b> | Prc1    | protein regulator of cytokinesis 1 [Source:MGI Symbol;Acc:MGI:1858961]                            |
| <b>ENSMUSG00000025395</b> | Prim1   | DNA primase, p49 subunit [Source:MGI Symbol;Acc:MGI:97757]                                        |
| <b>ENSMUSG00000026134</b> | Prim2   | DNA primase, p58 subunit [Source:MGI Symbol;Acc:MGI:97758]                                        |
| <b>ENSMUSG00000020493</b> | Prr11   | proline rich 11 [Source:MGI Symbol;Acc:MGI:2444496]                                               |
| <b>ENSMUSG00000068744</b> | Psrc1   | proline/serine-rich coiled-coil 1 [Source:MGI Symbol;Acc:MGI:1913099]                             |
| <b>ENSMUSG00000023015</b> | Racgap1 | Rac GTPase-activating protein 1 [Source:MGI Symbol;Acc:MGI:1349423]                               |
| <b>ENSMUSG00000030254</b> | Rad18   | RAD18 E3 ubiquitin protein ligase [Source:MGI Symbol;Acc:MGI:1890476]                             |
| <b>ENSMUSG00000022314</b> | Rad21   | RAD21 cohesin complex component [Source:MGI Symbol;Acc:MGI:108016]                                |
| <b>ENSMUSG00000027323</b> | Rad51   | RAD51 recombinase [Source:MGI Symbol;Acc:MGI:97890]                                               |
| <b>ENSMUSG00000028702</b> | Rad54l  | RAD54 like (S. cerevisiae) [Source:MGI Symbol;Acc:MGI:894697]                                     |
| <b>ENSMUSG00000022391</b> | Rangap1 | RAN GTPase activating protein 1 [Source:MGI Symbol;Acc:MGI:103071]                                |

|                           |          |                                                                                                         |
|---------------------------|----------|---------------------------------------------------------------------------------------------------------|
| <b>ENSMUSG00000033762</b> | Recql4   | RecQ protein-like 4 [Source:MGI Symbol;Acc:MGI:1931028]                                                 |
| <b>ENSMUSG00000038555</b> | Reep2    | receptor accessory protein 2 [Source:MGI Symbol;Acc:MGI:2385070]                                        |
| <b>ENSMUSG00000048668</b> | Rhno1    | RAD9-HUS1-RAD1 interacting nuclear orphan 1 [Source:MGI Symbol;Acc:MGI:1915315]                         |
| <b>ENSMUSG00000021932</b> | Rnaseh2b | ribonuclease H2, subunit B [Source:MGI Symbol;Acc:MGI:1914403]                                          |
| <b>ENSMUSG00000029110</b> | Rnf4     | ring finger protein 4 [Source:MGI Symbol;Acc:MGI:1201691]                                               |
| <b>ENSMUSG00000028884</b> | Rpa2     | replication protein A2 [Source:MGI Symbol;Acc:MGI:1339939]                                              |
| <b>ENSMUSG00000037846</b> | Rtkn2    | rothkin 2 [Source:MGI Symbol;Acc:MGI:2158417]                                                           |
| <b>ENSMUSG00000027959</b> | Sass6    | SAS-6 centriolar assembly protein [Source:MGI Symbol;Acc:MGI:1920026]                                   |
| <b>ENSMUSG00000023940</b> | Sgol1    | shugoshin-like 1 (S. pombe) [Source:MGI Symbol;Acc:MGI:1919665]                                         |
| <b>ENSMUSG00000026039</b> | Sgol2a   | shugoshin-like 2a (S. pombe) [Source:MGI Symbol;Acc:MGI:1098767]                                        |
| <b>ENSMUSG00000022322</b> | Shcbp1   | Shc SH2-domain binding protein 1 [Source:MGI Symbol;Acc:MGI:1338802]                                    |
| <b>ENSMUSG00000036223</b> | Ska1     | spindle and kinetochore associated complex subunit 1 [Source:MGI Symbol;Acc:MGI:1913718]                |
| <b>ENSMUSG00000054115</b> | Skp2     | S-phase kinase-associated protein 2 (p45) [Source:MGI Symbol;Acc:MGI:1351663]                           |
| <b>ENSMUSG00000054099</b> | Slc25a40 | solute carrier family 25, member 40 [Source:MGI Symbol;Acc:MGI:2442486]                                 |
| <b>ENSMUSG00000028312</b> | Smc2     | structural maintenance of chromosomes 2 [Source:MGI Symbol;Acc:MGI:106067]                              |
| <b>ENSMUSG00000034349</b> | Smc4     | structural maintenance of chromosomes 4 [Source:MGI Symbol;Acc:MGI:1917349]                             |
| <b>ENSMUSG00000024054</b> | Smchd1   | SMC hinge domain containing 1 [Source:MGI Symbol;Acc:MGI:1921605]                                       |
| <b>ENSMUSG00000061479</b> | Snrpa    | small nuclear ribonucleoprotein polypeptide A [Source:MGI Symbol;Acc:MGI:1855690]                       |
| <b>ENSMUSG00000002055</b> | Spag5    | sperm associated antigen 5 [Source:MGI Symbol;Acc:MGI:1927470]                                          |
| <b>ENSMUSG00000005233</b> | Spc25    | SPC25, NDC80 kinetochore complex component, homolog (S. cerevisiae) [Source:MGI Symbol;Acc:MGI:1913692] |
| <b>ENSMUSG00000069910</b> | Spdl1    | spindle apparatus coiled-coil protein 1 [Source:MGI Symbol;Acc:MGI:1917635]                             |
| <b>ENSMUSG00000028718</b> | Stil     | Scf/Tal1 interrupting locus [Source:MGI Symbol;Acc:MGI:107477]                                          |
| <b>ENSMUSG00000017548</b> | Suz12    | suppressor of zeste 12 homolog (Drosophila) [Source:MGI Symbol;Acc:MGI:1261758]                         |
| <b>ENSMUSG00000037313</b> | Tacc3    | transforming, acidic coiled-coil containing protein 3 [Source:MGI Symbol;Acc:MGI:1341163]               |
| <b>ENSMUSG00000024498</b> | Tcerg1   | transcription elongation regulator 1 (CA150) [Source:MGI Symbol;Acc:MGI:1926421]                        |
| <b>ENSMUSG00000039994</b> | Timeless | timeless circadian clock 1 [Source:MGI Symbol;Acc:MGI:1321393]                                          |
| <b>ENSMUSG00000025574</b> | Tk1      | thymidine kinase 1 [Source:MGI Symbol;Acc:MGI:98763]                                                    |
| <b>ENSMUSG00000019961</b> | Tmpo     | thymopoietin [Source:MGI Symbol;Acc:MGI:106920]                                                         |
| <b>ENSMUSG00000020914</b> | Top2a    | topoisomerase (DNA) II alpha [Source:MGI Symbol;Acc:MGI:98790]                                          |
| <b>ENSMUSG00000027469</b> | Tpx2     | TPX2, microtubule-associated [Source:MGI Symbol;Acc:MGI:1919369]                                        |

|                           |        |                                                                                  |
|---------------------------|--------|----------------------------------------------------------------------------------|
| <b>ENSMUSG00000032586</b> | Traip  | TRAF-interacting protein [Source:MGI Symbol;Acc:MGI:1096377]                     |
| <b>ENSMUSG00000032783</b> | Troap  | trophinin associated protein [Source:MGI Symbol;Acc:MGI:1925983]                 |
| <b>ENSMUSG00000038379</b> | Ttk    | Ttk protein kinase [Source:MGI Symbol;Acc:MGI:1194921]                           |
| <b>ENSMUSG00000001403</b> | Ube2c  | ubiquitin-conjugating enzyme E2C [Source:MGI Symbol;Acc:MGI:1915862]             |
| <b>ENSMUSG00000060860</b> | Ube2s  | ubiquitin-conjugating enzyme E2S [Source:MGI Symbol;Acc:MGI:1925141]             |
| <b>ENSMUSG00000026429</b> | Ube2t  | ubiquitin-conjugating enzyme E2T [Source:MGI Symbol;Acc:MGI:1914446]             |
| <b>ENSMUSG00000029591</b> | Ung    | uracil DNA glycosylase [Source:MGI Symbol;Acc:MGI:109352]                        |
| <b>ENSMUSG00000028560</b> | Usp1   | ubiquitin specific peptidase 1 [Source:MGI Symbol;Acc:MGI:2385198]               |
| <b>ENSMUSG00000031016</b> | Wee1   | WEE 1 homolog 1 (S. pombe) [Source:MGI Symbol;Acc:MGI:103075]                    |
| <b>ENSMUSG00000028180</b> | Zranb2 | zinc finger, RAN-binding domain containing 2 [Source:MGI Symbol;Acc:MGI:1858211] |
